# Supplementary material for: Possible Causal Association between Type 2 Diabetes and Glycaemic Traits in Primary Open-Angle Glaucoma: A Two-Sample Mendelian Randomisation Study
Source: MDPI journal article supplement (doi:10.3390/biomedicines12040866), 2024-04-15
Supplement: s1 [file s1]

## Possible Causal Association between Type 2 Diabetes and Glycaemic Traits in Primary Open-Angle Glaucoma: A Two-Sample Mendelian Randomisation Study

To reduce of concern according to population stratification, and enhance more robustly acknowledge, we performed additional analysis for association of type 2 diabetes and glaucoma as Table S2. As for the data set, Finnngen and UKB composed of European results were appropriately used. Type 2 diabetes are coding as 'type 2 diabetes with other specified/multiple/unspecified complications' and 'type 2 diabetes, definitions combined' in Finnngen. The authors will use the term 'type 2 diabetes with complications' for 'type 2 diabetes with other specified/multiple/unspecified complications' and 'type 2 diabetes' to refer to 'type 2 diabetes, definitions combined' in this paper.

**Table S2. Summary statistics of data source**

| Traits                            | Data source | No. of participants                       | Population | No. of Variants | Reference                                                                                                   |
|-----------------------------------|-------------|-------------------------------------------|------------|-----------------|-------------------------------------------------------------------------------------------------------------|
| Type 2 diabetes with complication | Finnngen    | 354,653 (46,373 cases + 308,280 controls) | European   | 20,169,746      | <a href="https://finngen.gitbook.io/documentation/v/r5/">https://finngen.gitbook.io/documentation/v/r5/</a> |
| Type 2 diabetes                   | Finnngen    | 365,950 (57,698 cases + 308,252 controls) | European   | 20,170,006      | <a href="https://finngen.gitbook.io/documentation/v/r5/">https://finngen.gitbook.io/documentation/v/r5/</a> |
| Glaucoma                          | UK biobank  | 456,348 (654 cases + 455,694 controls)    | European   | 11,831,932      | [66]                                                                                                        |

In addition, heterogeneity and horizontal pleiotropy of instrumental variables were described as Table S3. When interpreting these results, it was found that the MR results (exposure: type 2 diabetes with complication, or type 2 diabetes; outcome: glaucoma) should be interpreted focusing on the MR IVW method is ideal.

**Table S3. Heterogeneity and horizontal pleiotropy of instrumental variables**

| Exposure                             | Outcome  | Heterogeneity |       |                       |       |       | Horizontal pleiotropy |                      |       |                      |       |
|--------------------------------------|----------|---------------|-------|-----------------------|-------|-------|-----------------------|----------------------|-------|----------------------|-------|
|                                      |          | N             | F     | I <sup>2</sup><br>(%) | p*    | p†    | p‡                    | MR-Egger             |       | MR-Egger<br>(SIMEX)  |       |
|                                      |          |               |       |                       |       |       |                       | Intercept,<br>β (SE) | p     | Intercept,<br>β (SE) | p     |
| Type 2 diabetes<br>with complication | Glaucoma | 157           | 65.01 | 94.60                 | 0.417 | 0.425 | 0.407                 | -0.015<br>(0.013)    | 0.242 | -0.017<br>(0.013)    | 0.198 |
| Type 2 diabetes                      | Glaucoma | 155           | 67.83 | 94.74                 | 0.161 | 0.175 | 0.151                 | -0.018<br>(0.013)    | 0.169 | -0.02<br>(0.014)     | 0.148 |

N, number of instruments; F, mean F statistic; IVW, inverse-variance weight; MR, mendelian randomization; PRESSO, pleiotropy residual sum and outlier; SIMEX, simulation extrapolation; β, beta coefficient; SE, standard error \*Cochran's Q test from inverse-variance weight, † Rucker's Q' test from MR-Egger, ‡MR-pleiotropy residual sum and outlier global test

The results of MR analysis performed in the similar method as in the main text were obtained (**Fig S1**). Significant causal associations of 'type 2 diabetes with complication' on 'glaucoma' were observed (Odd ratio (OR): 1.24,  $P=0.006$  in IVW, OR: 1.33,  $P=0.033$  in MR weighted median, OR: 1.49,  $P=0.025$  in MR Egger, and OR: 1.55,  $P=0.023$  in MR Egger (SIMEX), **Fig S1 and Table S4**). In addition, significant causal associations of 'type 2 diabetes' on 'glaucoma' were observed (OR: 1.19,  $P=0.045$  in IVW, OR: 1.36,  $P=0.029$  in MR weighted median, OR: 1.52,  $P=0.035$  in MR Egger, and OR: 1.57,  $P=0.034$  in MR Egger (SIMEX), **Figure S1 and Table S4**).

**Figure S1. Forest plot for association of type 2 diabetes and glaucoma**

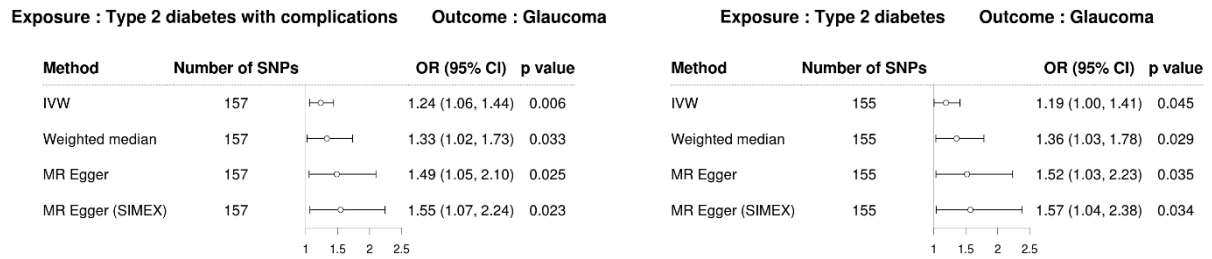

**Table S4. Estimates from MR methods for the association between type 2 diabetes and glaucoma**

| Exposure                          | Outcome  | Methods          | Parameter | N   | Odds ratio (95% CI) | p-value |
|-----------------------------------|----------|------------------|-----------|-----|---------------------|---------|
| Type 2 diabetes with complication | Glaucoma | IVW              | Estimate  | 157 | 1.24 (1.06, 1.44)   | 0.006   |
|                                   |          |                  | Estimate  |     | 1.33 (1.02, 1.73)   | 0.033   |
|                                   |          | MR-Egger         | Intercept |     | 0.99 (0.96, 1.01)   | 0.242   |
|                                   |          |                  | Slope     |     | 1.49 (1.05, 2.10)   | 0.025   |
|                                   |          | MR-Egger (SIMEX) | Intercept |     | 0.98 (0.96, 1.01)   | 0.198   |
|                                   |          |                  | Slope     |     | 1.55 (1.07, 2.24)   | 0.023   |
|                                   |          | MR-PRESSO        | Estimate  |     | 1.19 (1.00, 1.41)   | 0.045   |
|                                   |          |                  | Estimate  |     | 1.36 (1.03, 1.78)   | 0.029   |
|                                   |          | MR-Egger         | Intercept |     | 0.98 (0.96, 1.01)   | 0.169   |
|                                   |          |                  | Slope     |     | 1.52 (1.03, 2.23)   | 0.035   |
| Type 2 diabetes                   | Glaucoma | MR-Egger (SIMEX) | Intercept | 155 | 0.98 (0.95, 1.01)   | 0.148   |
|                                   |          |                  | Slope     |     | 1.57 (1.04, 2.38)   | 0.034   |
|                                   |          | MR-Egger (SIMEX) | Intercept |     | 0.98 (0.95, 1.01)   | 0.148   |
|                                   |          |                  | Slope     |     | 1.57 (1.04, 2.38)   | 0.034   |
|                                   |          | MR-Egger (SIMEX) | Intercept |     | 0.98 (0.95, 1.01)   | 0.148   |
|                                   |          |                  | Slope     |     | 1.57 (1.04, 2.38)   | 0.034   |
|                                   |          | MR-Egger (SIMEX) | Intercept |     | 0.98 (0.95, 1.01)   | 0.148   |
|                                   |          |                  | Slope     |     | 1.57 (1.04, 2.38)   | 0.034   |
|                                   |          | MR-Egger (SIMEX) | Intercept |     | 0.98 (0.95, 1.01)   | 0.148   |
|                                   |          |                  | Slope     |     | 1.57 (1.04, 2.38)   | 0.034   |

The genetic connection between type 2 diabetes effects on glaucoma were significant positive correlation (Figure S2).

**Figure S2. Scatter plots of MR tests assessing the type 2 diabetes and glaucoma**

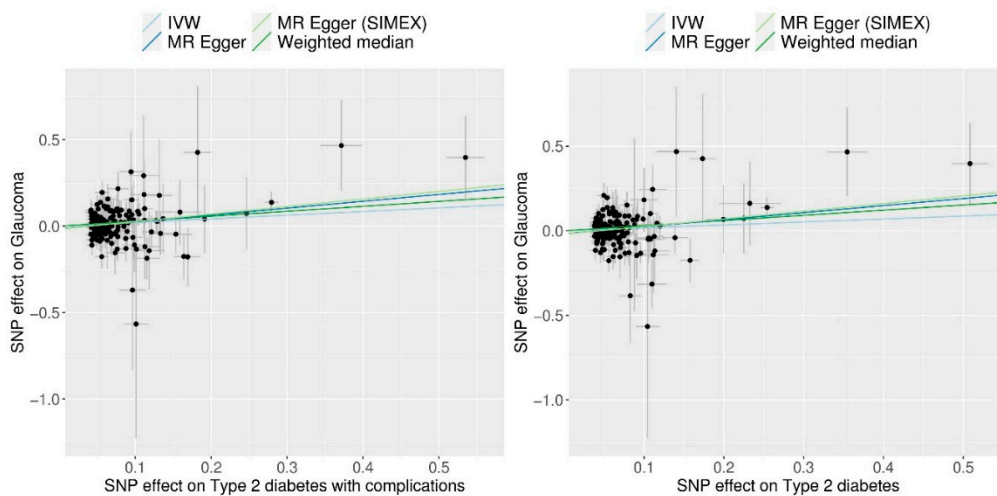

Light blue, light green, dark blue, and dark green regression lines represent the IVW, MR-Egger (SIMEX), MR-Egger, and weighted median estimate, respectively. MR, Mendelian randomization; SNP, single nucleotide polymorphism; IVW, inverse-variance weight; SIMEX, simulation extrapolation
