# Supplementary material for: Possible Causal Association between Type 2 Diabetes and Glycaemic Traits in Primary Open-Angle Glaucoma: A Two-Sample Mendelian Randomisation Study
Source: Biomedicines. 2024 Apr 15;12(4):866. doi: 10.3390/biomedicines12040866 (PMC11048047; doi:10.3390/biomedicines12040866)
Supplement: Supplementary file 1 [file biomedicines-12-00866-s001.zip › Supplementary Table S1.xlsx]

## Sheet: Sheet1
	Supplementary Table S1 List of single-nucleotide polymorphisms used as instrumental variables
	Exposure population	Exposure	SNP	Chr	Position	Nearby Gene	Effect Allele	Other Allele	Effect Allele Frequency	Beta	SE	P-value	F	MR-PRESSO outlier
	EAS + EUR	T2D	rs11802899	1	22112174	USP48;LDLRAD2	A	C	0.817422	-0.0497	0.0077	1.088e-10	74.6451
	EAS + EUR	T2D	rs755249	1	39995074	PPIEL	T	C	0.217225	0.0617	0.0077	1.453e-15	131.044
	EAS + EUR	T2D	rs57331401	1	51451372	CDKN2C;MIR4421	A	G	0.0894471	-0.0879	0.0125	1.692e-12	128.248
	EAS + EUR	T2D	rs1127215	1	117532790	PTGFRN	T	C	0.368543	-0.042	0.0066	2.537e-10	83.3502
	EAS + EUR	T2D	rs41463147	1	120554134	NOTCH2NLR	G	T	0.108962	0.083	0.0137	1.469e-09	135.135
	EAS + EUR	T2D	rs10900325	1	146692174	CHD1L;FMO5;NBPF19	C	T	0.841826	-0.0557	0.0082	8.751e-12	83.6137
	EAS + EUR	T2D	rs633715	1	177852580	LINC01741;CRYZL2P-SEC16B	C	T	0.218583	0.0491	0.0075	5.663e-11	83.4002
	EAS + EUR	T2D	rs340874	1	214159256	PROX1-AS1	C	T	0.493303	0.0535	0.0063	3.511e-17	145.152
	EAS + EUR	T2D	rs348330	1	229672955	ABCB10	A	G	0.543403	-0.0539	0.0068	3.356e-15	146.21
	EAS + EUR	T2D	rs13401686	2	650519	LOC105373352;TMEM18	G	A	0.150641	-0.0692	0.0092	4.243e-14	124.688
	EAS + EUR	T2D	rs11680058	2	16574669	GACAT3;FAM49A	A	G	0.879274	0.0633	0.0108	4.378e-09	86.5569
	EAS + EUR	T2D	rs1260326	2	27730940	GCKR	C	T	0.571429	0.071	0.0064	6.44e-29	250.641
	EAS + EUR	T2D	rs10195132	2	43537892	THADA	C	T	0.112073	-0.1068	0.0142	4.823e-14	231.472
	EAS + EUR	T2D	rs10201401	2	44810480	CAMKMT	A	G	0.787528	0.0421	0.0075	1.755e-08	60.2651
	EAS + EUR	T2D	rs1861410	2	58933591	LINC01122	T	C	0.573342	-0.0372	0.0064	4.669e-09	68.6598
	EAS + EUR	T2D	rs243021	2	60584819	LINC01793;MIR4432HG	A	G	0.516436	0.0422	0.0065	6.442e-11	90.2416
	EAS + EUR	T2D	rs2302647	2	65283174	CEP68	A	G	0.259287	-0.0429	0.007	9.233e-10	71.8097
	EAS + EUR	T2D	rs10169613	2	111934977	BCL2L11;MIR4435-2HG	T	C	0.446602	-0.0386	0.0063	1.162e-09	74.7342
	EAS + EUR	T2D	rs2382249	2	149515723	EPC2	G	A	0.217601	-0.0465	0.0082	1.285e-08	74.8141
	EAS + EUR	T2D	rs1128249	2	165528624	COBLL1	T	G	0.300292	-0.0786	0.0078	9.298e-24	263.895
	EAS + EUR	T2D	rs1840168	2	169478826	CERS6	T	C	0.294614	0.0409	0.0067	1.3e-09	70.4587
	EAS + EUR	T2D	rs2165059	2	196590022	SLC39A10	T	C	0.562285	-0.037	0.0063	4.39e-09	68.3436
	EAS + EUR	T2D	rs2943650	2	227105921	LOC646736;MIR5702	T	C	0.714845	0.0753	0.0078	4.362e-22	234.982
	EAS + EUR	T2D	rs2034761	2	234364426	DGKD	G	T	0.429369	-0.0375	0.0063	3.289e-09	69.9306
	EAS + EUR	T2D	rs17036160	3	12329783	PPARG	T	C	0.105331	-0.1092	0.0112	1.733e-22	229.207
	EAS + EUR	T2D	rs35352848	3	23455582	UBE2E2	C	T	0.213447	-0.0881	0.0078	1.362e-29	265.218
	EAS + EUR	T2D	rs62262091	3	47693664	SMARCC1	T	C	0.0970158	0.0876	0.0148	2.948e-09	135.77
	EAS + EUR	T2D	rs2578011	3	64004819	PSMD6	T	C	0.204526	-0.0693	0.0074	1.06e-20	158.936
	EAS + EUR	T2D	rs7638565	3	64723072	ADAMTS9-AS2	G	A	0.557701	0.0364	0.0065	2.191e-08	66.3299
	EAS + EUR	T2D	rs13318454	3	113032315	CFAP44	T	G	0.306007	0.041	0.0067	9.14e-10	72.3581
	EAS + EUR	T2D	rs72964564	3	123054770	ADCY5	C	A	0.231426	-0.1004	0.0104	3.964e-22	364.996
	EAS + EUR	T2D	rs9873519	3	124921457	SLC12A8	T	C	0.487086	0.0373	0.0065	7.626e-09	70.5204
	EAS + EUR	T2D	rs75671901	3	152406234	MBNL1;P2RY1	A	G	0.0627567	-0.0694	0.0118	3.984e-09	57.6946
	EAS + EUR	T2D	rs13073970	3	170630520	EIF5A2;SLC2A2	T	G	0.193647	-0.0499	0.008	4.991e-10	79.0391
	EAS + EUR	T2D	rs7615045	3	185521126	IGF2BP2	G	A	0.319188	0.1259	0.0067	8.224e-80	696.815
	EAS + EUR	T2D	rs3887925	3	186665645	ST6GAL1	T	C	0.49964	0.053	0.0063	3.3e-17	142.483	excluded
	EAS + EUR	T2D	rs13086642	3	187705040	LINC01991;LPP-AS2	A	G	0.092455	-0.0599	0.0101	3.537e-09	61.2694
	EAS + EUR	T2D	rs73221113	4	718868	PCGF3	A	G	0.039939	0.0933	0.016	6.128e-09	67.3421
	EAS + EUR	T2D	rs35385487	4	1286339	MAEA	G	A	0.11622	-0.076	0.0089	1.471e-17	120.807
	EAS + EUR	T2D	rs1046316	4	6304087	WFS1	G	A	0.745203	0.0999	0.0087	1.628e-30	385.649
	EAS + EUR	T2D	rs10938398	4	45186139	GNPDA2;GABRG1	A	G	0.406542	0.0491	0.0065	5.39e-14	117.945
	EAS + EUR	T2D	rs6554060	4	52776901	DCUN1D4	G	A	0.376916	0.0366	0.0066	3.588e-08	63.7937
	EAS + EUR	T2D	rs6853272	4	71735967	GRSF1;MOB1B	T	C	0.923642	-0.0718	0.0103	3.843e-12	73.4789
	EAS + EUR	T2D	rs17008861	4	85335624	LOC101928978;NKX6-1	T	C	0.0323696	-0.1159	0.0163	1.151e-12	85.9297
	EAS + EUR	T2D	rs62319060	4	96145415	UNC5C	C	T	0.470491	0.0371	0.0066	1.952e-08	69.5642
	EAS + EUR	T2D	rs12505942	4	140906390	MAML3	C	T	0.324649	-0.0389	0.0068	9.191e-09	67.3736
	EAS + EUR	T2D	rs6813195	4	153520475	MIR4453HG;TMEM154	T	C	0.353285	-0.062	0.0066	4.376e-21	178.399
	EAS + EUR	T2D	rs30614	5	14780521	ANKH	G	A	0.549729	-0.0401	0.007	1.119e-08	80.7374
	EAS + EUR	T2D	rs2648731	5	52072194	LINC02118;ITGA1	A	G	0.240353	0.0647	0.0072	3.469e-19	154.741
	EAS + EUR	T2D	rs173964	5	55809465	C5orf67	G	A	0.659881	0.06	0.0066	9.434e-20	164.133
	EAS + EUR	T2D	rs6453133	5	74692776	CERT1	G	A	0.357642	-0.0438	0.0065	1.565e-11	89.4929
	EAS + EUR	T2D	rs6878122	5	76427311	ZBED3-AS1	A	G	0.778957	-0.0547	0.0092	2.461e-09	104.325
	EAS + EUR	T2D	rs13162708	5	87943345	LINC00461	T	C	0.208377	0.0546	0.0075	4.283e-13	99.5723
	EAS + EUR	T2D	rs10062657	5	95867908	LOC101929710	A	C	0.799903	-0.0417	0.0075	2.592e-08	56.3804
	EAS + EUR	T2D	rs76177300	5	102143311	PAM	A	G	0.0551313	0.1309	0.0187	2.593e-12	179.705
	EAS + EUR	T2D	rs1966265	5	176516631	FGFR4	A	G	0.322278	-0.0465	0.0068	6.925e-12	95.9208
	EAS + EUR	T2D	rs9379084	6	7231843	RREB1	A	G	0.156857	-0.0816	0.0085	1.044e-21	179.294
	EAS + EUR	T2D	rs72830608	6	20519120	E2F3;CDKAL1	T	G	0.305978	0.0482	0.0077	3.267e-10	99.9797
	EAS + EUR	T2D	rs9368222	6	20686996	CDKAL1	A	C	0.318552	0.1551	0.0066	2.04e-122	1055.65
	EAS + EUR	T2D	rs2240064	6	31114573	CCHCR1	A	G	0.568057	0.0591	0.0064	2.866e-20	173.975
	EAS + EUR	T2D	rs9501129	6	31417396	LINC01149;HCP5	C	T	0.17793	0.0478	0.0084	1.109e-08	67.6752
	EAS + EUR	T2D	rs3998159	6	32682019	HLA-DQB1;HLA-DQA2	C	A	0.105756	0.1221	0.0103	1.845e-32	284.257
	EAS + EUR	T2D	rs111643014	6	34165308	GRM4;HMGA1	A	G	0.048687	-0.1048	0.0129	3.946e-16	103.81
	EAS + EUR	T2D	rs998584	6	43757896	VEGFA;LINC02537	A	C	0.499389	0.0434	0.0063	3.869e-12	95.5412
	EAS + EUR	T2D	rs62405419	6	50787459	TFAP2B	T	G	0.156975	0.0565	0.0082	4.604e-12	85.4984
	EAS + EUR	T2D	rs17496664	6	76199697	FILIP1	T	C	0.277089	-0.0468	0.0085	3.664e-08	89.1329
	EAS + EUR	T2D	rs72951548	6	118050841	NUS1;SLC35F1	T	C	0.188488	-0.0627	0.0078	1.241e-15	122.305
	EAS + EUR	T2D	rs4273712	6	126964510	MIR588;RSPO3	G	A	0.320615	0.0577	0.0066	2.982e-18	146.943
	EAS + EUR	T2D	rs6917676	6	137291296	SLC35D3;NHEG1	G	T	0.510055	-0.0552	0.0064	3.619e-18	154.484
	EAS + EUR	T2D	rs6905453	6	143167564	HIVEP2	T	C	0.215635	-0.0469	0.0075	3.264e-10	75.6106
	EAS + EUR	T2D	rs6919504	6	156976650	SNORD28B;ARID1B	G	A	0.0677522	0.0625	0.0111	1.679e-08	49.8848
	EAS + EUR	T2D	rs543159	6	160776017	SLC22A3	A	C	0.427571	-0.0364	0.0065	2.388e-08	65.819
	EAS + EUR	T2D	rs4721089	7	1872921	MAD1L1	T	C	0.79582	0.0452	0.0081	2.738e-08	67.4693
	EAS + EUR	T2D	rs10950494	7	13892902	ARL4A;ETV1	A	G	0.450764	0.0361	0.0063	1.077e-08	65.4483
	EAS + EUR	T2D	rs17168486	7	14898282	DGKB	T	C	0.238504	0.0626	0.0071	1.573e-18	144.103
	EAS + EUR	T2D	rs11514706	7	15059272	DGKB;AGMO	C	A	0.500501	0.0601	0.0063	8.548e-22	183.216
	EAS + EUR	T2D	rs860262	7	28194397	JAZF1	A	C	0.420673	-0.0668	0.0068	9.181e-23	220.792
	EAS + EUR	T2D	rs2010825	7	44188220	GCK	C	T	0.519789	0.0411	0.0063	8.621e-11	85.5581
	EAS + EUR	T2D	rs4140975	7	69161000	AUTS2	A	C	0.0720981	0.0684	0.0108	2.148e-10	63.2647
	EAS + EUR	T2D	rs6954715	7	69776980	AUTS2	G	A	0.256541	0.0585	0.0071	1.476e-16	132.192
	EAS + EUR	T2D	rs35473599	7	74088893	GTF2I	A	G	0.182945	0.0553	0.0093	2.665e-09	92.5371
	EAS + EUR	T2D	rs11770630	7	89805241	STEAP2-AS1	T	C	0.462566	0.0401	0.0067	2.423e-09	81.092
	EAS + EUR	T2D	rs151253726	7	102421273	FAM185A	A	C	0.188872	-0.0758	0.0109	2.893e-12	179.119
	EAS + EUR	T2D	rs7778167	7	127851628	MIR129-1;LEP	A	G	0.216676	0.0571	0.0082	4.224e-12	112.046
	EAS + EUR	T2D	rs4731701	7	130430930	KLF14;MIR29A	T	C	0.43764	-0.0484	0.0065	1.312e-13	117.02
	EAS + EUR	T2D	rs1988842	7	150541355	TMEM176A;AOC1	C	T	0.326966	0.0408	0.007	5.675e-09	74.2579
	EAS + EUR	T2D	rs6459737	7	156975136	UBE3C	A	G	0.392716	-0.0511	0.0064	2.04e-15	126.44
	EAS + EUR	T2D	rs16885494	8	36697279	KCNU1	T	G	0.176111	0.0473	0.008	3.657e-09	65.7351
	EAS + EUR	T2D	rs6989203	8	41523745	ANK1	A	G	0.207207	-0.0969	0.0081	4.704e-33	314.058
	EAS + EUR	T2D	rs1362891	8	41666299	ANK1	A	G	0.0714984	-0.0821	0.0117	2.082e-12	91.1843
	EAS + EUR	T2D	rs12546365	8	95911477	NDUFAF6	C	T	0.55818	-0.0381	0.0065	4.657e-09	72.6141
	EAS + EUR	T2D	rs13266634	8	118184783	SLC30A8	T	C	0.348803	-0.1053	0.0065	1.967e-59	512.016
	EAS + EUR	T2D	rs868655	9	1037118	DMRT3;LINC01230	A	C	0.3407	0.0406	0.0066	5.579e-10	75.0625
	EAS + EUR	T2D	rs1574285	9	4283137	GLIS3	T	G	0.583008	-0.065	0.0063	1.173e-24	208.259
	EAS + EUR	T2D	rs10965250	9	22133284	CDKN2B-AS1;DMRTA1	A	G	0.235558	-0.1644	0.0073	7.72e-114	992.705
	EAS + EUR	T2D	rs7045760	9	22288404	CDKN2B-AS1;DMRTA1	A	G	0.0394967	-0.0942	0.0151	4.326e-10	68.6658
	EAS + EUR	T2D	rs12001437	9	34074476	UBAP2;DCAF12	C	T	0.413559	0.0367	0.0064	1.015e-08	66.251
	EAS + EUR	T2D	rs13292347	9	81908202	LOC101927450;TLE4	C	T	0.0708272	-0.0727	0.0122	2.565e-09	70.8456
	EAS + EUR	T2D	rs9410573	9	84311800	LOC101927502	C	T	0.474299	-0.0682	0.0064	9.558e-27	235.358
	EAS + EUR	T2D	rs554833	9	136147160	ABO	T	C	0.376316	0.0443	0.0064	4.188e-12	93.3889
	EAS + EUR	T2D	rs28642213	9	139248082	GPSM1	G	A	0.773252	0.1006	0.0079	3.804e-37	361.253
	EAS + EUR	T2D	rs11257655	10	12307894	CDC123;CAMK1D	T	C	0.281992	0.1084	0.0069	2.362e-55	481.248
	EAS + EUR	T2D	rs4073527	10	12401811	CAMK1D	C	T	0.0307644	0.0953	0.015	2.088e-10	54.6243
	EAS + EUR	T2D	rs2768344	10	12598378	CAMK1D	T	C	0.833624	0.0459	0.0084	4.771e-08	59.4007
	EAS + EUR	T2D	rs75872811	10	63732315	ARID5B	G	A	0.0871287	-0.0727	0.0102	1.034e-12	85.6102
	EAS + EUR	T2D	rs11001399	10	77221744	LRMDA	C	A	0.546055	-0.0386	0.0063	7.944e-10	74.9186
	EAS + EUR	T2D	rs703977	10	80944230	ZMIZ1	G	T	0.458876	-0.0668	0.0063	1.184e-26	224.889
	EAS + EUR	T2D	rs145109691	10	94270942	IDE	G	T	0.122755	0.0637	0.01	1.812e-10	88.3818
	EAS + EUR	T2D	rs1977833	10	94463945	HHEX;EXOC6	A	G	0.502981	-0.1118	0.0065	2.526e-65	633.955
	EAS + EUR	T2D	rs12763565	10	94520143	HHEX;EXOC6	G	T	0.134488	0.0624	0.01	4.5e-10	91.6896
	EAS + EUR	T2D	rs114322470	10	114736670	TCF7L2	G	T	0.0204657	-0.2281	0.0301	3.233e-14	214.328
	EAS + EUR	T2D	rs34872471	10	114754071	TCF7L2	C	T	0.207525	0.2972	0.0091	1e-200	2912.61
	EAS + EUR	T2D	rs17101591	10	122947203	WDR11;FGFR2	T	C	0.0577437	-0.0683	0.0114	2.413e-09	51.6906
	EAS + EUR	T2D	rs7107784	11	2215089	MIR4686;ASCL2	A	G	0.774621	-0.0532	0.0083	1.39e-10	100.066
	EAS + EUR	T2D	rs7925578	11	2729947	KCNQ1	T	G	0.463149	0.0675	0.0073	1.942e-20	229.783
	EAS + EUR	T2D	rs2237897	11	2858546	KCNQ1	T	C	0.249812	-0.2678	0.009	1.24e-196	2748.79
	EAS + EUR	T2D	rs10128597	11	8694830	TRIM66;RPL27A	A	G	0.363824	-0.0412	0.0068	1.436e-09	79.7708
	EAS + EUR	T2D	rs5215	11	17408630	KCNJ11	T	C	0.616015	-0.0623	0.0064	2.408e-22	186.103
	EAS + EUR	T2D	rs11033115	11	35435433	SLC1A2	C	A	0.0427421	-0.0725	0.013	2.547e-08	43.8138
	EAS + EUR	T2D	rs12806430	11	49510856	FOLH1;LOC440040	C	A	0.56501	-0.0431	0.0076	1.31e-08	92.5995
	EAS + EUR	T2D	rs67924081	11	65342981	EHBP1L1	G	A	0.236593	0.0512	0.0076	1.438e-11	95.9004
	EAS + EUR	T2D	rs11603349	11	72460694	ARAP1	C	T	0.141664	-0.1028	0.01	5.581e-25	261.905
	EAS + EUR	T2D	rs10466351	11	92697981	LINC02746;MTNR1B	T	C	0.399748	0.0474	0.0064	1.626e-13	109.317
	EAS + EUR	T2D	rs11819995	11	128389391	ETS1	T	C	0.213049	0.0493	0.0077	1.265e-10	82.529
	EAS + EUR	T2D	rs3217893	12	4403876	CCND2	T	C	0.0917195	-0.1195	0.0154	9.715e-15	242.812
	EAS + EUR	T2D	rs4517619	12	24090004	SOX5	G	T	0.384609	0.0395	0.007	2.053e-08	74.8835
	EAS + EUR	T2D	rs12578595	12	27964996	KLHL42;PTHLH	T	C	0.222896	-0.0715	0.0073	1.726e-22	180.111
	EAS + EUR	T2D	rs7132908	12	50263148	FAIM2	A	G	0.358104	0.0394	0.0066	2.63e-09	72.3487
	EAS + EUR	T2D	rs2257883	12	66216162	RPSAP52	A	G	0.185898	0.0689	0.0077	3.642e-19	145.363
	EAS + EUR	T2D	rs1707498	12	71478626	PTPRR;TSPAN8	A	C	0.449132	-0.0499	0.0063	1.472e-15	125.036
	EAS + EUR	T2D	rs79978636	12	97851233	NEDD1;RMST	G	T	0.210278	-0.043	0.0075	1.164e-08	62.3962
	EAS + EUR	T2D	rs1426371	12	108629780	WSCD2	A	G	0.337897	-0.0486	0.0066	2.039e-13	107.321
	EAS + EUR	T2D	rs7132351	12	118414926	KSR2;RFC5	A	G	0.17439	0.063	0.0079	1.777e-15	115.638
	EAS + EUR	T2D	rs56158042	12	121455589	C12orf43;OASL	A	G	0.301523	-0.0625	0.0093	1.988e-11	167.179
	EAS + EUR	T2D	rs11147271	12	133079987	FBRSL1	A	G	0.253923	0.0477	0.0079	1.47e-09	87.326
	EAS + EUR	T2D	rs504652	13	26779053	RNF6	G	T	0.164415	0.0488	0.0087	2.115e-08	66.2418
	EAS + EUR	T2D	rs576674	13	33554302	LINC00423;KL	A	G	0.856359	-0.0802	0.0091	1.721e-18	159.936
	EAS + EUR	T2D	rs9562987	13	51095908	DLEU1;DLEU1-AS1	A	G	0.41532	-0.0413	0.0069	2.307e-09	84.0749
	EAS + EUR	T2D	rs11616380	13	80705315	LINC01080;SPRY2	T	G	0.284421	-0.0752	0.007	3.397e-27	233.996
	EAS + EUR	T2D	rs72640313	13	91950181	LINC00379;MIR17HG	A	G	0.116012	-0.0615	0.0094	6.621e-11	78.9309
	EAS + EUR	T2D	rs4901812	14	38800704	CLEC14A;LINC00639	A	G	0.333674	-0.0408	0.0067	1.085e-09	75.1579
	EAS + EUR	T2D	rs73347525	14	101255172	DLK1;MIR2392	G	A	0.201505	-0.0536	0.008	2.485e-11	93.9788
	EAS + EUR	T2D	rs11846158	14	103292959	TRAF3	G	A	0.283548	0.037	0.0068	4.886e-08	56.3698
	EAS + EUR	T2D	rs8043085	15	38828140	RASGRP1	T	G	0.301228	0.0457	0.0068	1.836e-11	89.0908
	EAS + EUR	T2D	rs3743140	15	40616742	INAFM2	A	G	0.152268	0.0623	0.0082	3.84e-14	101.368
	EAS + EUR	T2D	rs149336329	15	52587740	MYO5C	T	G	0.0459427	-0.1063	0.0148	7.974e-13	101.085
	EAS + EUR	T2D	rs117430555	15	57610146	LINC00926;LINC01413	T	G	0.0336968	0.1366	0.0235	5.961e-09	122.232
	EAS + EUR	T2D	rs7172432	15	62396389	C2CD4A;C2CD4B	G	A	0.452818	-0.0604	0.0063	8.278e-22	183.467
	EAS + EUR	T2D	rs8033589	15	75596685	GOLGA6D;COMMD4	A	G	0.732707	0.043	0.0073	4.12e-09	73.5655
	EAS + EUR	T2D	rs12910361	15	77782335	HMG20A;LOC101929457	G	A	0.626089	0.0696	0.0066	3.875e-26	230.343
	EAS + EUR	T2D	rs17240471	15	90371171	ANPEP;AP3S2	A	G	0.391067	-0.0414	0.0071	6.373e-09	82.8595
	EAS + EUR	T2D	rs6496742	15	91523036	PRC1-AS1	T	C	0.303172	0.0582	0.0067	5.762e-18	144.976
	EAS + EUR	T2D	rs7167984	15	93832067	LOC105370980;LINC02207	A	G	0.235461	-0.0433	0.0074	4.313e-09	68.5792
	EAS + EUR	T2D	rs4632135	16	20337884	GP2	C	T	0.0339896	0.0832	0.0152	4.764e-08	45.8823
	EAS + EUR	T2D	rs56094641	16	53806453	FTO	G	A	0.352899	0.1166	0.0069	2.229e-64	628.538
	EAS + EUR	T2D	rs13330951	16	69563842	CYB5B;MIR1538	G	A	0.394587	-0.0396	0.0072	3.913e-08	76.0479
	EAS + EUR	T2D	rs66502159	16	75245937	CTRB2;CTRB1	T	C	0.0790016	-0.1049	0.0132	1.793e-15	163.329
	EAS + EUR	T2D	rs2925979	16	81534790	CMIP	C	T	0.685877	-0.0446	0.0067	2.419e-11	86.8619
	EAS + EUR	T2D	rs12453376	17	4032785	ZZEF1	G	A	0.2041	0.0581	0.0076	2.333e-14	111.011
	EAS + EUR	T2D	rs75418188	17	6945483	SLC16A11	T	C	0.0276409	0.1337	0.0157	1.664e-17	96.662
	EAS + EUR	T2D	rs7141	17	7614601	EFNB3	A	G	0.6394	-0.0357	0.0065	3.753e-08	59.5845
	EAS + EUR	T2D	rs4795608	17	29731964	RAB11FIP4	G	A	0.350995	0.037	0.0065	1.337e-08	63.2297
	EAS + EUR	T2D	rs3110641	17	36047417	HNF1B	G	A	0.76149	0.0598	0.0072	1.335e-16	132.037
	EAS + EUR	T2D	rs7501939	17	36101156	HNF1B	C	T	0.642542	-0.0923	0.0066	1.835e-44	396.341
	EAS + EUR	T2D	rs35895680	17	47060322	GIP;IGF2BP1	A	C	0.24391	-0.0584	0.0087	2.444e-11	127.854
	EAS + EUR	T2D	rs2706710	17	65641651	PITPNC1	T	C	0.161364	0.0495	0.0088	1.962e-08	67.1319
	EAS + EUR	T2D	rs6567160	18	57829135	PMAIP1;MC4R	C	T	0.218731	0.0785	0.0076	4.877e-25	213.052
	EAS + EUR	T2D	rs8100562	19	7241501	INSR	T	C	0.170998	0.0559	0.0088	1.893e-10	89.6634
	EAS + EUR	T2D	rs2115107	19	7968168	MAP2K7	A	G	0.372125	0.0451	0.0065	4.698e-12	96.3539
	EAS + EUR	T2D	rs4808844	19	18811966	CRTC1	G	A	0.541585	-0.0481	0.0074	9.773e-11	116.514
	EAS + EUR	T2D	rs12979148	19	19406869	SUGP1	C	T	0.139455	0.0504	0.0088	1.033e-08	61.7059
	EAS + EUR	T2D	rs7250869	19	33887405	PEPD	C	T	0.628785	-0.0488	0.0065	5.169e-14	112.692
	EAS + EUR	T2D	rs429358	19	45411941	APOE	C	T	0.14701	-0.0739	0.0092	1.024e-15	139.399
	EAS + EUR	T2D	rs10408179	19	46157004	EML2;GIPR	C	T	0.38792	-0.0675	0.0067	1.331e-23	219.707
	EAS + EUR	T2D	rs12625671	20	42994812	HNF4A	C	T	0.203237	0.0565	0.0076	1.054e-13	104.657
	EAS + EUR	T2D	rs6066137	20	45590658	EYA2	T	C	0.263925	-0.0815	0.0129	2.341e-10	262.441
	EAS + EUR	T2D	rs45551238	20	57607363	SLMO2-ATP5E	T	C	0.0188627	-0.229	0.0278	1.775e-16	199.445
	EAS + EUR	T2D	rs5762867	22	29255655	XBP1;ZNRF3	G	A	0.362109	0.0389	0.007	2.702e-08	70.8699
	EAS + EUR	T2D	rs142682088	22	30170655	UQCR10;ASCC2	A	G	0.0401343	-0.1263	0.0217	6.02e-09	125.561
	EAS + EUR	T2D	rs28645887	22	50356274	PIM3	T	C	0.473837	-0.0402	0.0066	1.349e-09	81.7584
	EAS + EUR	FG	rs12139196	1	3107386	PRDM16	T	G	0.206199	-0.015	0.0025	1.746e-09	36
	EAS + EUR	FG	rs2624439	1	93944790	FNBP1L	T	C	0.383408	-0.0116	0.0021	2.339e-08	30.5125
	EAS + EUR	FG	rs12057397	1	100923182	CDC14A	A	G	0.17255	0.021	0.0033	1.68e-10	40.4959
	EAS + EUR	FG	rs320368	1	118143948	LOC100996263	G	A	0.724097	-0.0212	0.0023	3.373e-20	84.9603
	EAS + EUR	FG	rs2075423	1	214154719	PROX1-AS1	T	G	0.273493	-0.0261	0.0023	1.279e-28	128.773
	EAS + EUR	FG	rs348330	1	229672955	ABCB10	A	G	0.530419	-0.0159	0.0022	2.805e-13	52.2335
	EAS + EUR	FG	rs1260326	2	27730940	GCKR	C	T	0.557851	0.0362	0.002	7.495e-70	327.61
	EAS + EUR	FG	rs80323638	2	43469615	THADA	A	G	0.0701084	-0.0421	0.0042	5.943e-24	100.477
	EAS + EUR	FG	rs12712929	2	45192105	SIX3;SIX2	T	G	0.220688	0.0379	0.0025	1.083e-52	229.826
	EAS + EUR	FG	rs881309	2	45193734	SIX3;SIX2	A	C	0.105435	0.0208	0.0033	2.589e-10	39.7282
	EAS + EUR	FG	rs2444769	2	158494100	ACVR1C;ACVR1	A	C	0.831353	-0.017	0.0028	1.333e-09	36.8622
	EAS + EUR	FG	rs9287903	2	169680122	NOSTRIN	T	C	0.778996	-0.0237	0.0025	1.556e-21	89.8704
	EAS + EUR	FG	rs13431652	2	169753415	SPC25;G6PC2	C	T	0.244836	-0.1165	0.0025	1e-200	2171.56
	EAS + EUR	FG	rs16856187	2	169770386	G6PC2;ABCB11	C	A	0.121431	0.0426	0.0034	6.231e-37	156.986
	EAS + EUR	FG	rs7583805	2	173598612	RAPGEF4-AS1	A	G	0.309866	0.013	0.0024	4.639e-08	29.3403
	EAS + EUR	FG	rs7650482	3	12841804	CAND2	G	A	0.547989	-0.0125	0.0021	5.24e-09	35.4308
	EAS + EUR	FG	rs73079003	3	49832788	CDHR4	A	G	0.12523	-0.0208	0.0037	2.762e-08	31.6026
	EAS + EUR	FG	rs7640470	3	100210509	TMEM45A	A	G	0.536696	0.0113	0.0021	4.471e-08	28.9546
	EAS + EUR	FG	rs11708067	3	123065778	ADCY5	G	A	0.172649	-0.0509	0.0029	7.959e-70	308.063
	EAS + EUR	FG	rs79767329	3	141155344	ZBTB38	T	G	0.047967	-0.0479	0.0059	2.723e-16	65.9124
	EAS + EUR	FG	rs114952596	3	152396380	MBNL1;P2RY1	G	A	0.0263725	-0.0367	0.0066	2.12e-08	30.9203
	EAS + EUR	FG	rs9873618	3	170733076	SLC2A2	A	G	0.261883	-0.0549	0.0023	1.22e-124	569.756
	EAS + EUR	FG	rs6808574	3	187740523	LINC01991;LPP-AS2	C	T	0.725533	0.0196	0.0026	1.728e-14	56.8284
	EAS + EUR	FG	rs79407053	4	1244218	CTBP1-DT	A	G	0.118228	-0.0204	0.0033	3.439e-10	38.2149
	EAS + EUR	FG	rs1801214	4	6303022	WFS1	T	C	0.71269	0.0161	0.0025	1.148e-10	41.4736
	EAS + EUR	FG	rs1503884	4	18207538	LCORL;SLIT2	G	T	0.407039	0.0116	0.0021	2.549e-08	30.5125
	EAS + EUR	FG	rs11728350	4	106078097	TET2	G	A	0.0909568	0.0244	0.0037	3.235e-11	43.4887
	EAS + EUR	FG	rs116401167	4	185715685	ACSL1	C	T	0.13969	-0.0312	0.0036	6.609e-18	75.1111
	EAS + EUR	FG	rs392794	5	55808342	C5orf67	T	C	0.66434	0.0125	0.0023	3.392e-08	29.5369
	EAS + EUR	FG	rs7732130	5	76435004	ZBED3-AS1	A	G	0.769862	-0.0203	0.0026	8.932e-15	60.9601
	EAS + EUR	FG	rs7700417	5	95720359	LOC101929710	C	T	0.266228	-0.0237	0.0023	3.842e-25	106.18
	EAS + EUR	FG	rs40949	5	148166106	HTR4;ADRB2	A	G	0.456125	0.0126	0.002	6.328e-10	39.69
	EAS + EUR	FG	rs80097396	6	7125529	RREB1	G	A	0.080428	-0.0318	0.0046	3.127e-12	47.7902
	EAS + EUR	FG	rs76823979	6	7236663	RREB1	T	C	0.129485	-0.0301	0.0032	2.28e-21	88.4775
	EAS + EUR	FG	rs7766070	6	20686573	CDKAL1	A	C	0.311439	0.027	0.0022	7.602e-35	150.62
	EAS + EUR	FG	rs116074669	6	31294953	LINC02571;HLA-B	T	C	0.106628	-0.0313	0.0056	2.536e-08	31.2401
	EAS + EUR	FG	rs45627734	6	31474884	MICB	A	G	0.0576692	-0.0275	0.0043	1.445e-10	40.9005
	EAS + EUR	FG	rs12208956	6	33618791	ITPR3	T	C	0.23135	-0.0168	0.0024	1.57e-12	49
	EAS + EUR	FG	rs1317983	6	43806335	VEGFA;LINC02537	C	T	0.748994	-0.018	0.0024	6.713e-14	56.25
	EAS + EUR	FG	rs1761832	6	117280434	RFX6;VGLL2	T	C	0.753046	0.0183	0.0024	1.376e-14	58.1406
	EAS + EUR	FG	rs727332	6	127399045	MIR588;RSPO3	G	A	0.245692	-0.0172	0.0024	1.134e-12	51.3611
	EAS + EUR	FG	rs4385321	6	153394728	RGS17	A	G	0.419779	0.015	0.0021	8.907e-13	51.0204
	EAS + EUR	FG	rs17168486	7	14898282	DGKB	T	C	0.240984	0.0311	0.0024	2.276e-38	167.918
	EAS + EUR	FG	rs1974620	7	15065467	DGKB;AGMO	T	C	0.591899	0.0378	0.0021	1.046e-73	324
	EAS + EUR	FG	rs1513272	7	28200097	JAZF1	T	C	0.352486	-0.0152	0.0025	8.557e-10	36.9664
	EAS + EUR	FG	rs117892540	7	44081629	LINC00957	T	C	0.024501	-0.0556	0.0082	1.359e-11	45.975
	EAS + EUR	FG	rs76323047	7	44185955	GCK	G	A	0.127748	0.0364	0.003	1.255e-33	147.218
	EAS + EUR	FG	rs730497	7	44223721	GCK	A	G	0.17748	0.0849	0.0026	1e-200	1066.27
	EAS + EUR	FG	rs718336	7	44698972	OGDH	A	C	0.024739	-0.0598	0.0082	3.99e-13	53.1832
	EAS + EUR	FG	rs10265504	7	50786050	GRB10	G	A	0.724083	-0.0171	0.0022	2.471e-14	60.4153
	EAS + EUR	FG	rs11763820	7	89818945	STEAP2-AS1	G	T	0.469386	0.0138	0.0021	2.519e-11	43.1837
	EAS + EUR	FG	rs221797	7	100285974	GIGYF1	C	A	0.909083	0.0279	0.0036	7.886e-15	60.0625
	EAS + EUR	FG	rs9987289	8	9183358	LOC157273	G	A	0.932575	-0.0442	0.0042	3.418e-26	110.751
	EAS + EUR	FG	rs1320164	8	95960767	NDUFAF6;TP53INP1	A	G	0.566506	-0.0148	0.0021	7.731e-13	49.6689
	EAS + EUR	FG	rs13266634	8	118184783	SLC30A8	T	C	0.338652	-0.0425	0.0021	6.845e-89	409.58
	EAS + EUR	FG	rs3757974	8	145545546	DGAT1	G	A	0.403882	0.0148	0.0021	2.141e-12	49.6689
	EAS + EUR	FG	rs1574285	9	4283137	GLIS3	T	G	0.590289	-0.0208	0.0021	6.038e-24	98.1043
	EAS + EUR	FG	rs10965247	9	22132729	CDKN2B-AS1;DMRTA1	G	A	0.253458	-0.0299	0.0024	2.562e-36	155.21
	EAS + EUR	FG	rs7018475	9	22137685	CDKN2B-AS1;DMRTA1	G	T	0.296183	0.0178	0.0022	9.149e-16	65.4628
	EAS + EUR	FG	rs830577	9	33288610	CHMP5;NFX1	T	G	0.827242	0.0187	0.0027	2.019e-12	47.9684
	EAS + EUR	FG	rs16913693	9	111680359	ELP1	G	T	0.025205	-0.0465	0.0079	4.245e-09	34.6459
	EAS + EUR	FG	rs2519093	9	136141870	ABO	T	C	0.211024	0.0233	0.0025	2.795e-21	86.8624
	EAS + EUR	FG	rs28533815	9	139241828	GPSM1	C	T	0.790778	0.0248	0.0025	8.024e-23	98.4064
	EAS + EUR	FG	rs11257655	10	12307894	CDC123;CAMK1D	T	C	0.278537	0.0231	0.0023	2.52e-23	100.871
	EAS + EUR	FG	rs10508715	10	26500658	MYO3A	G	A	0.248473	-0.0161	0.0024	1.241e-11	45.0017
	EAS + EUR	FG	rs7075575	10	52643078	A1CF	G	A	0.754133	0.0136	0.0024	1.675e-08	32.1111
	EAS + EUR	FG	rs56046350	10	113018159	HEAT2;GPAM	T	C	0.0822157	-0.0449	0.0037	5.648e-34	147.262
	EAS + EUR	FG	rs7903146	10	114758349	TCF7L2	T	C	0.217198	0.0508	0.0026	1.717e-85	381.751
	EAS + EUR	FG	rs3842753	11	2181060	INS	G	T	0.785735	-0.0245	0.0026	1.696e-20	88.7944
	EAS + EUR	FG	rs2237897	11	2858546	KCNQ1	T	C	0.374972	-0.0409	0.0036	6.308e-30	129.075
	EAS + EUR	FG	rs110420	11	8253049	LMO1	C	T	0.457154	-0.015	0.0021	2.504e-13	51.0204
	EAS + EUR	FG	rs141521721	11	14763828	PDE3B	A	C	0.024463	0.0546	0.0081	1.327e-11	45.4376
	EAS + EUR	FG	rs757110	11	17418477	ABCC8	A	C	0.630914	-0.0166	0.0021	1.667e-15	62.4853
	EAS + EUR	FG	rs11039165	11	47312689	MADD	G	A	0.1941	-0.0321	0.0027	1.512e-31	141.346
	EAS + EUR	FG	rs174576	11	61603510	FADS2	A	C	0.365061	-0.0182	0.0021	3.422e-18	75.1111
	EAS + EUR	FG	rs1552224	11	72433098	ARAP1	C	A	0.120618	-0.0241	0.0032	5.134e-14	56.7197
	EAS + EUR	FG	rs12581677	12	24060732	SOX5	G	A	0.0839976	-0.0201	0.0036	3.338e-08	31.1736
	EAS + EUR	FG	rs7133214	12	27957533	KLHL42;PTHLH	G	T	0.232195	-0.0188	0.0024	5.01e-15	61.3611
	EAS + EUR	FG	rs3741414	12	57844049	INHBC	T	C	0.24387	-0.0163	0.0029	1.759e-08	31.5922
	EAS + EUR	FG	rs721156	12	97864143	RMST	T	C	0.0411423	-0.0443	0.0053	5.879e-17	69.8644
	EAS + EUR	FG	rs61211588	12	125585506	AACS	A	G	0.0493875	0.0273	0.0047	7.399e-09	33.7388
	EAS + EUR	FG	rs1882297	12	133069134	FBRSL1	A	G	0.266	0.016	0.0024	1.566e-11	44.4444
	EAS + EUR	FG	rs7982229	13	26890041	CDK8	A	C	0.484975	-0.0112	0.002	3.708e-08	31.36
	EAS + EUR	FG	rs58572472	13	28501137	PDX1	A	G	0.225079	-0.0195	0.0025	3.343e-15	60.84
	EAS + EUR	FG	rs11839569	13	33560493	LINC00423;KL	G	A	0.157815	0.0315	0.0028	7.042e-30	126.562
	EAS + EUR	FG	rs1359790	13	80717156	LINC01080;SPRY2	A	G	0.282798	-0.0161	0.0022	6.601e-13	53.5558
	EAS + EUR	FG	rs35889227	14	90055468	FOXN3	T	G	0.474918	-0.0255	0.0023	1.303e-27	122.921
	EAS + EUR	FG	rs1535464	14	100793431	SLC25A47	A	G	0.203867	-0.0144	0.0026	2.14e-08	30.6746
	EAS + EUR	FG	rs11856877	15	40620560	INAFM2;CCDC9B	G	A	0.159951	0.0153	0.0028	3.291e-08	29.8584
	EAS + EUR	FG	rs1836996	15	62368895	C2CD4A;C2CD4B	T	C	0.53066	0.0174	0.0025	2.493e-12	48.4416
	EAS + EUR	FG	rs12915304	15	63975017	HERC1	G	A	0.231363	-0.0167	0.0026	6.798e-11	41.2559
	EAS + EUR	FG	rs11633054	15	77747276	HMG20A	G	A	0.62171	0.0181	0.0022	6.444e-17	67.688
	EAS + EUR	FG	rs8037137	15	91506637	RCCD1	C	T	0.234765	0.0146	0.0026	9.822e-09	31.5325
	EAS + EUR	FG	rs2239740	16	311992	FAM234A	C	A	0.17152	-0.0276	0.0034	2.319e-16	65.8962
	EAS + EUR	FG	rs9937053	16	53799507	FTO	A	G	0.365778	0.0134	0.0021	3.647e-10	40.7166
	EAS + EUR	FG	rs4968204	17	7570929	TP53	T	C	0.76537	-0.014	0.0024	7.826e-09	34.0278
	EAS + EUR	FG	rs8073398	17	17340512	NT5M;MED9	C	T	0.564146	-0.0129	0.0021	3.584e-10	37.7347
	EAS + EUR	FG	rs8614	17	27588806	NUFIP2	A	C	0.281458	-0.0168	0.0023	8.223e-13	53.3535
	EAS + EUR	FG	rs11651755	17	36099840	HNF1B	T	C	0.56251	-0.0172	0.0021	7.821e-17	67.0839
	EAS + EUR	FG	rs62076542	17	45558090	MRPL45P2	T	C	0.4899	0.0178	0.0025	9.833e-13	50.6944	excluded
	EAS + EUR	FG	rs62078369	17	47026431	SNF8;GIP	T	C	0.589409	0.0122	0.0021	5.974e-09	33.7506
	EAS + EUR	FG	rs58642235	17	62202689	ERN1	C	T	0.14016	0.0269	0.0036	1.587e-13	55.8341
	EAS + EUR	FG	rs883541	17	66449122	WIPI1	A	G	0.713572	-0.019	0.0022	2.541e-17	74.5868
	EAS + EUR	FG	rs1964272	19	46190268	SNRPD2	A	G	0.48375	-0.0167	0.0025	2.08e-11	44.6224
	EAS + EUR	FG	rs1974	20	22562311	FOXA2	A	G	0.0849548	-0.0362	0.0036	1.342e-23	101.114
	EAS + EUR	FG	rs8356	20	43536455	YWHAB	T	C	0.226097	-0.0156	0.0025	2.313e-10	38.9376
	EAS + EUR	FG	rs8115194	20	57281809	STX16-NPEPL1	T	C	0.192834	-0.015	0.0026	7.996e-09	33.284
	EAS + EUR	FG	rs73155719	22	25210306	SGSM1	G	A	0.218021	0.0139	0.0025	3.59e-08	30.9136
	EAS + EUR	HbA1c	rs1175550	1	3691528	SMIM1	G	A	0.23081	-0.0422	0.0028	1.51e-52	227.148
	EAS + EUR	HbA1c	rs7513688	1	6652745	KLHL21	A	G	0.333601	0.0172	0.0022	2.94e-15	61.124
	EAS + EUR	HbA1c	rs644592	1	25703156	RHCE	T	C	0.172534	0.0308	0.0027	5.253e-30	130.129
	EAS + EUR	HbA1c	rs4970486	1	26871669	RPS6KA1	T	C	0.73088	-0.0155	0.0026	2.044e-09	35.5399
	EAS + EUR	HbA1c	rs61787567	1	29064036	YTHDF2	T	C	0.22761	0.0151	0.0027	4.178e-08	31.2771
	EAS + EUR	HbA1c	rs17513135	1	40035686	PABPC4-AS1	T	C	0.2153	0.0217	0.0025	2.487e-18	75.3424
	EAS + EUR	HbA1c	rs10890333	1	46100322	GPBP1L1	C	T	0.30286	-0.0193	0.0025	9.821e-15	59.5984	excluded
	EAS + EUR	HbA1c	rs72900998	1	51205760	FAF1	C	T	0.0894576	-0.0337	0.0035	1.238e-21	92.7094
	EAS + EUR	HbA1c	rs11206015	1	53242187	ZYG11B	C	T	0.40783	-0.0128	0.0023	4.92e-08	30.9716
	EAS + EUR	HbA1c	rs6699769	1	78504264	DNAJB4;GIPC2	G	A	0.239887	-0.0138	0.0024	5.828e-09	33.0625
	EAS + EUR	HbA1c	rs11166447	1	100875628	CDC14A	C	T	0.31697	-0.0126	0.0023	3.012e-08	30.0113
	EAS + EUR	HbA1c	rs17020764	1	108592549	VAV3-AS1;SLC25A24	C	T	0.046516	0.0314	0.0055	9.314e-09	32.5937
	EAS + EUR	HbA1c	rs1975283	1	118142558	LOC100996263	C	A	0.708937	-0.0236	0.0023	2.16e-25	105.285
	EAS + EUR	HbA1c	rs699779	1	120455310	NOTCH2	G	A	0.0932982	0.0216	0.0036	1.85e-09	36
	EAS + EUR	HbA1c	rs198325	1	150937405	CERS2;SETDB1	T	C	0.191086	-0.025	0.0027	9.472e-21	85.7339
	EAS + EUR	HbA1c	rs4133213	1	154395212	IL6R	A	C	0.442993	-0.0116	0.0021	2.122e-08	30.5125
	EAS + EUR	HbA1c	rs12748814	1	155310443	ASH1L	T	C	0.085378	0.0258	0.0041	3.483e-10	39.5979
	EAS + EUR	HbA1c	rs857725	1	158607935	SPTA1	G	T	0.286586	0.0657	0.0022	2.93e-192	891.837
	EAS + EUR	HbA1c	rs7528296	1	172381383	DNM3	C	T	0.404514	-0.0134	0.0021	8.021e-11	40.7166
	EAS + EUR	HbA1c	rs1044145	1	207217359	YOD1	C	T	0.484238	0.0182	0.0021	7.394e-18	75.1111
	EAS + EUR	HbA1c	rs1078308	1	213705895	RPS6KC1;PROX1-AS1	C	A	0.77265	-0.018	0.0026	2.888e-12	47.929
	EAS + EUR	HbA1c	rs235924	1	214156860	PROX1-AS1	C	T	0.696345	0.0317	0.0023	2.474e-44	189.96
	EAS + EUR	HbA1c	rs114526150	1	214175531	PROX1	G	T	0.02115	0.0527	0.008	5.229e-11	43.3952
	EAS + EUR	HbA1c	rs348330	1	229672955	ABCB10	A	G	0.574124	-0.0193	0.0022	3.126e-19	76.9607
	EAS + EUR	HbA1c	rs3811444	1	248039451	TRIM58	T	C	0.30854	0.0222	0.0022	1.711e-23	101.826
	EAS + EUR	HbA1c	rs2630718	2	8574287	LINC00299;LINC01814	C	T	0.687142	-0.0134	0.0023	2.918e-09	33.9433
	EAS + EUR	HbA1c	rs72781680	2	24238928	MFSD2B	T	C	0.114034	0.0512	0.0033	1.193e-53	240.72
	EAS + EUR	HbA1c	rs892448	2	26366205	RAB10;GAREM2	G	A	0.815856	0.0151	0.0027	1.508e-08	31.2771
	EAS + EUR	HbA1c	rs1260326	2	27730940	GCKR	C	T	0.578888	0.0223	0.0021	1.802e-27	112.764
	EAS + EUR	HbA1c	rs888083	2	37117073	STRN	T	C	0.440554	-0.0146	0.002	8.65e-13	53.29
	EAS + EUR	HbA1c	rs77981966	2	43777964	THADA	T	C	0.076555	-0.0726	0.0043	5.974e-63	285.06	excluded
	EAS + EUR	HbA1c	rs10205222	2	45188525	SIX3;SIX2	G	A	0.138488	0.0241	0.0029	1.591e-16	69.0618
	EAS + EUR	HbA1c	rs78583604	2	48070873	FBXO11	T	G	0.13668	0.0266	0.0035	2.568e-14	57.76
	EAS + EUR	HbA1c	rs13019832	2	60710571	BCL11A	A	G	0.347268	-0.0238	0.0023	1.201e-24	107.078
	EAS + EUR	HbA1c	rs72822612	2	68945739	PROKR1;ARHGAP25	A	C	0.28315	-0.0145	0.0025	1.116e-08	33.64
	EAS + EUR	HbA1c	rs4435501	2	96981369	SNRNP200;ITPRIPL1	C	A	0.10638	0.0209	0.0038	4.267e-08	30.25
	EAS + EUR	HbA1c	rs10169613	2	111934977	BCL2L11;MIR4435-2HG	T	C	0.461234	-0.0138	0.002	1.122e-11	47.61
	EAS + EUR	HbA1c	rs10184004	2	165508389	GRB14;COBLL1	T	C	0.350666	-0.014	0.0022	4.781e-10	40.4959
	EAS + EUR	HbA1c	rs6433093	2	169658944	NOSTRIN	C	A	0.758907	-0.0222	0.0025	9.475e-19	78.8544
	EAS + EUR	HbA1c	rs13431652	2	169753415	SPC25;G6PC2	C	T	0.272117	-0.0853	0.0024	1e-200	1263.21
	EAS + EUR	HbA1c	rs79121130	2	175294257	SCRN3	T	C	0.178799	0.0296	0.0026	2.365e-29	129.609
	EAS + EUR	HbA1c	rs10804111	2	202145612	CASP8	T	C	0.644363	0.0115	0.0021	4.86e-08	29.9887
	EAS + EUR	HbA1c	rs6736362	2	219115108	ARPC2	T	C	0.562188	0.0134	0.002	4.736e-11	44.89
	EAS + EUR	HbA1c	rs1399627	2	227083411	LOC646736;MIR5702	G	A	0.697733	0.022	0.0023	1.212e-21	91.4934
	EAS + EUR	HbA1c	rs838717	2	234296444	DGKD	A	G	0.569843	0.016	0.002	5.477e-15	64	excluded
	EAS + EUR	HbA1c	rs2596933	3	9365746	SRGAP3-AS4;THUMPD3	A	G	0.759349	-0.0144	0.0025	6.999e-09	33.1776
	EAS + EUR	HbA1c	rs9826367	3	12294202	SYN2;PPARG	G	A	0.380539	-0.036	0.0022	8.358e-58	267.769
	EAS + EUR	HbA1c	rs1496653	3	23454790	UBE2E2	G	A	0.195708	-0.0194	0.0026	4.004e-14	55.6746
	EAS + EUR	HbA1c	rs9883409	3	49331060	USP4	C	T	0.149179	0.0365	0.0029	8.992e-36	158.413
	EAS + EUR	HbA1c	rs12492391	3	52912296	STIMATE;STIMATE-MUSTN1	A	C	0.35379	0.0142	0.0024	3.594e-09	35.0069
	EAS + EUR	HbA1c	rs4368494	3	64701387	ADAMTS9-AS2	A	G	0.381365	-0.0141	0.0023	1.085e-09	37.5822
	EAS + EUR	HbA1c	rs9840088	3	66442545	LRIG1	C	A	0.280811	-0.0154	0.0024	2.449e-10	41.1736
	EAS + EUR	HbA1c	rs11708067	3	123065778	ADCY5	G	A	0.203418	-0.0524	0.0027	1.363e-85	376.647
	EAS + EUR	HbA1c	rs9873519	3	124921457	SLC12A8	T	C	0.49709	0.0147	0.0021	7.459e-13	49
	EAS + EUR	HbA1c	rs4678408	3	138053187	NME9;MRAS	G	A	0.638295	-0.0187	0.0021	1.132e-18	79.2948
	EAS + EUR	HbA1c	rs6810158	3	141148231	ZBTB38	C	T	0.08701	-0.0288	0.0041	1.905e-12	49.3421
	EAS + EUR	HbA1c	rs9839074	3	152215437	MBNL1;P2RY1	C	T	0.11028	-0.0242	0.0037	5.27e-11	42.7787
	EAS + EUR	HbA1c	rs9828639	3	152392877	MBNL1;P2RY1	G	T	0.652635	-0.0173	0.0021	3.37e-16	67.8662
	EAS + EUR	HbA1c	rs6785881	3	160153989	TRIM59-IFT80	T	C	0.434082	-0.0167	0.0021	2.223e-15	63.2404
	EAS + EUR	HbA1c	rs9290397	3	170360106	SLC7A14-AS1	G	T	0.159344	0.0162	0.0027	3.496e-09	36
	EAS + EUR	HbA1c	rs9873618	3	170733076	SLC2A2	A	G	0.27337	-0.0392	0.0023	9.414e-66	290.48
	EAS + EUR	HbA1c	rs6808166	3	171791275	FNDC3B	A	G	0.545587	0.0253	0.002	4.068e-35	160.023
	EAS + EUR	HbA1c	rs477777	3	182591413	ATP11B	C	T	0.717988	0.0148	0.0023	1.849e-10	41.4064
	EAS + EUR	HbA1c	rs73061095	3	185516807	IGF2BP2	G	T	0.319301	0.024	0.0022	1.204e-28	119.008
	EAS + EUR	HbA1c	rs6777684	3	187741842	LINC01991;LPP-AS2	G	A	0.60967	0.0259	0.0024	7.135e-28	116.46
	EAS + EUR	HbA1c	rs11917973	3	195838613	TFRC;LINC00885	T	C	0.403915	-0.0153	0.0022	3.872e-12	48.3657
	EAS + EUR	HbA1c	rs1798635	3	196474289	PAK2	T	C	0.512542	-0.0178	0.0021	6.685e-18	71.8458
	EAS + EUR	HbA1c	rs73221116	4	720681	PCGF3	A	G	0.0356383	0.0327	0.0055	3.978e-09	35.3484
	EAS + EUR	HbA1c	rs4234731	4	6299914	WFS1	G	A	0.658473	0.0178	0.0023	2.149e-14	59.8941
	EAS + EUR	HbA1c	rs6840504	4	18205102	LCORL;SLIT2	T	C	0.427571	0.0139	0.0021	1.945e-11	43.8118
	EAS + EUR	HbA1c	rs34811474	4	25408838	ANAPC4	A	G	0.23194	-0.0159	0.0027	5.018e-09	34.679
	EAS + EUR	HbA1c	rs4864483	4	52851319	DCUN1D4;LRRC66	T	G	0.29372	0.0182	0.0025	5.915e-13	52.9984
	EAS + EUR	HbA1c	rs1481012	4	89039082	ABCG2	G	A	0.143817	0.0235	0.0029	2.853e-16	65.6659
	EAS + EUR	HbA1c	rs5026475	4	103554821	MANBA	C	T	0.56123	-0.012	0.002	3.567e-09	36
	EAS + EUR	HbA1c	rs11728350	4	106078097	TET2	G	A	0.105557	0.0279	0.0034	4.553e-16	67.3365
	EAS + EUR	HbA1c	rs10021157	4	110829734	LRIT3;EGF	A	G	0.447155	-0.0179	0.0021	1.945e-17	72.6553
	EAS + EUR	HbA1c	rs7679687	4	144945184	GYPB;GYPA	T	G	0.3098	0.0525	0.0025	5.1e-99	441
	EAS + EUR	HbA1c	rs76505278	4	146016257	ANAPC10	C	T	0.10326	-0.0277	0.0038	2.646e-13	53.1364
	EAS + EUR	HbA1c	rs75636043	4	157805551	PDGFC	A	G	0.078182	-0.0254	0.0043	3.883e-09	34.8924
	EAS + EUR	HbA1c	rs1996546	4	185714289	ACSL1	T	G	0.1407	-0.0331	0.0033	1.67e-23	100.607
	EAS + EUR	HbA1c	rs35188965	5	1104938	SLC12A7	T	C	0.521328	0.0153	0.0021	7.129e-13	53.0816
	EAS + EUR	HbA1c	rs879253	5	14794868	ANKH	T	C	0.612114	-0.018	0.0022	2.793e-16	66.9421
	EAS + EUR	HbA1c	rs56395926	5	34507418	NONE;RAI14	A	G	0.22883	-0.016	0.0027	5.211e-09	35.1166
	EAS + EUR	HbA1c	rs3857286	5	54863190	PLPP1;SLC38A9	T	C	0.695215	-0.0133	0.0022	1.435e-09	36.5475
	EAS + EUR	HbA1c	rs6893283	5	55296666	FLJ31104	T	C	0.01453	-0.0559	0.0096	6.013e-09	33.9064
	EAS + EUR	HbA1c	rs35585881	5	71957318	LINC02056	A	G	0.0904537	0.0201	0.0035	1.246e-08	32.9804
	EAS + EUR	HbA1c	rs35662301	5	75590283	SV2C	C	T	0.115998	0.021	0.0031	1.749e-11	45.8897
	EAS + EUR	HbA1c	rs6878122	5	76427311	ZBED3-AS1	A	G	0.73181	-0.0262	0.0024	6.994e-27	119.174
	EAS + EUR	HbA1c	rs17419291	5	87780432	LINC02060;LINC00461	C	T	0.087057	-0.0245	0.0041	1.907e-09	35.7079
	EAS + EUR	HbA1c	rs17462893	5	95163437	GLRX;LOC102724720	G	A	0.10103	0.0259	0.0038	1.309e-11	46.455
	EAS + EUR	HbA1c	rs153569	5	112274827	REEP5;DCP2	C	T	0.430791	0.0118	0.0021	2.089e-08	31.5737
	EAS + EUR	HbA1c	rs2549007	5	131826875	IRF1	C	T	0.66085	-0.0156	0.0021	3.827e-13	55.1837
	EAS + EUR	HbA1c	rs35018839	5	154024044	MIR3141;LARP1	G	A	0.105758	-0.0194	0.0033	3.979e-09	34.5601
	EAS + EUR	HbA1c	rs4704834	5	156443066	TIMD4;HAVCR1	G	A	0.675649	0.0183	0.0022	1.139e-16	69.1921
	EAS + EUR	HbA1c	rs7720275	5	158246650	EBF1	C	T	0.147638	0.0233	0.0029	2.535e-15	64.5529
	EAS + EUR	HbA1c	rs3748059	6	6900951	LY86;RREB1	G	A	0.804083	-0.0204	0.0026	8.106e-15	61.5621
	EAS + EUR	HbA1c	rs13192435	6	7218337	RREB1	C	T	0.025466	0.0522	0.0073	8.477e-13	51.1323
	EAS + EUR	HbA1c	rs78588343	6	7249460	RREB1	A	G	0.15054	-0.0321	0.003	2.484e-27	114.49
	EAS + EUR	HbA1c	rs67131976	6	20686878	CDKAL1	T	C	0.215514	0.047	0.0025	1.782e-80	353.44
	EAS + EUR	HbA1c	rs142513102	6	26071106	HIST1H1C;LOC108783645	G	A	0.026358	-0.0718	0.0072	1.837e-23	99.4452
	EAS + EUR	HbA1c	rs1800562	6	26093141	HFE	A	G	0.078843	-0.1248	0.0043	4.04e-188	842.349
	EAS + EUR	HbA1c	rs6457116	6	29938025	HLA-A;HCG9	A	G	0.0227913	0.0409	0.007	6.065e-09	34.139
	EAS + EUR	HbA1c	rs3117106	6	32343369	TSBP1-AS1	C	T	0.159404	0.0381	0.0028	3.158e-43	185.154
	EAS + EUR	HbA1c	rs111643014	6	34165308	GRM4;HMGA1	A	G	0.0414604	-0.0293	0.0049	1.851e-09	35.7555
	EAS + EUR	HbA1c	rs833058	6	43731854	MRPS18A;VEGFA	T	C	0.421888	0.0161	0.0021	4.389e-14	58.7778
	EAS + EUR	HbA1c	rs998584	6	43757896	VEGFA;LINC02537	A	C	0.493075	0.0196	0.002	3.757e-22	96.04
	EAS + EUR	HbA1c	rs1533584	6	53221183	ELOVL5;GCLC	C	T	0.29964	0.017	0.0025	1.821e-11	46.24
	EAS + EUR	HbA1c	rs13199088	6	109973408	AK9	T	C	0.26649	-0.022	0.0026	2.852e-17	71.5976
	EAS + EUR	HbA1c	rs12210538	6	110760008	SLC22A16	G	A	0.195718	-0.0284	0.0027	1.05e-25	110.639
	EAS + EUR	HbA1c	rs1490384	6	126851160	MIR588;RSPO3	T	C	0.582663	0.0179	0.0023	5.728e-15	60.569
	EAS + EUR	HbA1c	rs9376091	6	135419636	HBS1L;MYB	T	C	0.275425	-0.0411	0.0023	8.163e-74	319.321
	EAS + EUR	HbA1c	rs592423	6	139840693	LINC01625;FILNC1	C	A	0.499297	-0.016	0.0021	2.533e-14	58.0499
	EAS + EUR	HbA1c	rs17080069	6	150989698	PLEKHG1	G	A	0.0659463	0.0238	0.0042	1.103e-08	32.1111
	EAS + EUR	HbA1c	rs6920313	6	153402841	RGS17	C	T	0.317744	0.0146	0.0022	1.656e-11	44.0413
	EAS + EUR	HbA1c	rs637614	6	160772133	SLC22A3	C	T	0.47456	-0.0171	0.0023	1.053e-13	55.276
	EAS + EUR	HbA1c	rs4721089	7	1872921	MAD1L1	T	C	0.800039	0.0141	0.0026	4.007e-08	29.4098
	EAS + EUR	HbA1c	rs836472	7	6434904	RAC1	A	G	0.361502	-0.0133	0.0024	1.515e-08	30.7101
	EAS + EUR	HbA1c	rs17168486	7	14898282	DGKB	T	C	0.213054	0.0239	0.0025	7.668e-22	91.3936
	EAS + EUR	HbA1c	rs6947830	7	15064984	DGKB;AGMO	A	G	0.573881	0.0244	0.0021	2.924e-32	135.002
	EAS + EUR	HbA1c	rs1708302	7	28198677	JAZF1	T	C	0.415368	-0.0265	0.0023	1.087e-30	132.75
	EAS + EUR	HbA1c	rs2267716	7	30716643	CRHR2	C	T	0.227714	-0.0145	0.0024	1.842e-09	36.5017
	EAS + EUR	HbA1c	rs76323047	7	44185955	GCK	G	A	0.123808	0.041	0.0031	4.804e-41	174.922
	EAS + EUR	HbA1c	rs730497	7	44223721	GCK	A	G	0.177903	0.0902	0.0026	1e-200	1203.56
	EAS + EUR	HbA1c	rs801207	7	66020590	GS1-124K5.11	C	T	0.485545	-0.0146	0.0021	1.389e-12	48.3356
	EAS + EUR	HbA1c	rs1524518	7	69808153	AUTS2	A	G	0.250974	0.0172	0.0023	1.578e-13	55.9244
	EAS + EUR	HbA1c	rs10278905	7	77051490	LOC101927243	A	G	0.632641	-0.0131	0.0021	3.179e-10	38.9138
	EAS + EUR	HbA1c	rs7797401	7	80320633	CD36;SEMA3C	A	G	0.440081	-0.0136	0.0021	9.166e-11	41.941
	EAS + EUR	HbA1c	rs117666847	7	99023418	ATP5MF-PTCD1;PTCD1	A	G	0.039983	0.0527	0.0059	3.825e-19	79.7843
	EAS + EUR	HbA1c	rs7808970	7	100080738	NYAP1	G	A	0.317535	0.0128	0.0023	2.09e-08	30.9716
	EAS + EUR	HbA1c	rs12670684	7	123405942	WASL;RNU6-1	G	A	0.080097	-0.0461	0.0042	1.462e-27	120.477
	EAS + EUR	HbA1c	rs1838931	7	130455588	KLF14;MIR29A	T	C	0.350528	0.0139	0.0022	1.097e-10	39.9194
	EAS + EUR	HbA1c	rs6459737	7	156975136	UBE3C	A	G	0.380185	-0.016	0.0021	1.907e-14	58.0499
	EAS + EUR	HbA1c	rs7820334	8	10573702	C8orf74;SOX7	T	C	0.271713	-0.0218	0.0024	1.972e-19	82.5069
	EAS + EUR	HbA1c	rs13272050	8	23406241	SLC25A37	T	C	0.17063	-0.0192	0.0031	3.817e-10	38.36
	EAS + EUR	HbA1c	rs6474359	8	41549194	ANK1	C	T	0.0396596	-0.0947	0.0051	2.588e-76	344.794
	EAS + EUR	HbA1c	rs4737010	8	41630447	ANK1	A	G	0.267535	0.0628	0.0023	3.98e-158	745.527
	EAS + EUR	HbA1c	rs55840085	8	42339634	SLC20A2	A	G	0.360689	0.0182	0.0021	3.942e-18	75.1111
	EAS + EUR	HbA1c	rs113073038	8	59406545	CYP7A1	T	C	0.042962	0.031	0.0057	4.915e-08	29.5783
	EAS + EUR	HbA1c	rs62523081	8	95946160	NDUFAF6;TP53INP1	A	G	0.330763	0.0148	0.0022	1.438e-11	45.2562
	EAS + EUR	HbA1c	rs636089	8	103077790	NCALD	C	T	0.387388	0.0126	0.0021	1.447e-09	36
	EAS + EUR	HbA1c	rs2737265	8	116667634	TRPS1	G	A	0.281117	-0.0195	0.0022	5.132e-18	78.564
	EAS + EUR	HbA1c	rs13266634	8	118184783	SLC30A8	T	C	0.325994	-0.0527	0.0021	4.55e-133	629.771
	EAS + EUR	HbA1c	rs2954032	8	126493392	TRIB1;LINC00861	G	A	0.6903	0.0146	0.0022	1.786e-11	44.0413
	EAS + EUR	HbA1c	rs2060985	8	131024701	FAM49B	G	A	0.548997	-0.0159	0.002	5.469e-15	63.2025
	EAS + EUR	HbA1c	rs3757972	8	145545920	DGAT1	T	C	0.387452	0.0182	0.0021	7.623e-18	75.1111
	EAS + EUR	HbA1c	rs1574285	9	4283137	GLIS3	T	G	0.595179	-0.016	0.0021	9.354e-15	58.0499
	EAS + EUR	HbA1c	rs2236498	9	4844778	RCL1	C	A	0.251818	-0.0217	0.0024	2.987e-20	81.7517
	EAS + EUR	HbA1c	rs10811660	9	22134068	CDKN2B-AS1;DMRTA1	A	G	0.217241	-0.048	0.0025	6.236e-84	368.64
	EAS + EUR	HbA1c	rs11145347	9	79846516	VPS13A	C	T	0.168344	0.0336	0.0028	5.557e-33	144
	EAS + EUR	HbA1c	rs62550975	9	91408132	MIR4289;C9orf47	G	A	0.062659	-0.0935	0.0047	2.476e-86	395.756
	EAS + EUR	HbA1c	rs7047279	9	97249230	MFSD14B;PCAT7	C	T	0.534305	-0.014	0.0021	8.281e-12	44.4444
	EAS + EUR	HbA1c	rs1967604	9	110530324	KLF4;ACTL7B	G	A	0.716898	-0.026	0.0023	7.216e-31	127.788
	EAS + EUR	HbA1c	rs78340269	9	124112337	STOM	C	T	0.041658	0.0466	0.0058	5.413e-16	64.5529
	EAS + EUR	HbA1c	rs2596694	9	125677272	ZBTB26	T	C	0.85502	0.0201	0.0033	8.374e-10	37.0992
	EAS + EUR	HbA1c	rs9408986	9	131888435	PTPA	C	A	0.29394	-0.0194	0.0025	1.661e-14	60.2176
	EAS + EUR	HbA1c	rs8193004	9	135866154	GFI1B	T	C	0.58056	-0.0112	0.002	4.454e-08	31.36
	EAS + EUR	HbA1c	rs550057	9	136146597	ABO	T	C	0.258459	0.0406	0.0023	1.682e-69	311.599
	EAS + EUR	HbA1c	rs28641468	9	139239585	GPSM1	C	T	0.776288	0.033	0.0025	7.089e-41	174.24
	EAS + EUR	HbA1c	rs34983547	9	140102886	NDOR1	A	G	0.163	-0.035	0.0031	2.56e-29	127.471	excluded
	EAS + EUR	HbA1c	rs11257655	10	12307894	CDC123;CAMK1D	T	C	0.250344	0.0341	0.0024	8.595e-47	201.877
	EAS + EUR	HbA1c	rs11254406	10	17191692	TRDMT1	G	A	0.421247	-0.0124	0.0021	4.832e-09	34.8662
	EAS + EUR	HbA1c	rs61848153	10	50230127	VSTM4	C	A	0.2458	-0.0327	0.0027	1.554e-34	146.679
	EAS + EUR	HbA1c	rs34878143	10	70830526	KIF1BP;SRGN	C	T	0.0203651	-0.0579	0.0075	8.44e-15	59.5984
	EAS + EUR	HbA1c	rs117679105	10	70901423	VPS26A	T	C	0.027085	-0.1311	0.0071	2.235e-76	340.948
	EAS + EUR	HbA1c	rs10998678	10	71023829	HKDC1	A	G	0.052496	0.0484	0.0052	6.292e-21	86.6331
	EAS + EUR	HbA1c	rs12765993	10	71065688	HK1	T	C	0.93861	0.1329	0.0044	1e-200	912.315
	EAS + EUR	HbA1c	rs150705486	10	71093216	HK1	A	G	0.015663	-0.2964	0.0095	1e-200	973.44
	EAS + EUR	HbA1c	rs2305196	10	71144324	HK1	A	G	0.324952	-0.0267	0.0022	9.289e-33	147.291
	EAS + EUR	HbA1c	rs1248678	10	79607372	DLG5	A	G	0.300894	0.0148	0.0022	2.08e-11	45.2562
	EAS + EUR	HbA1c	rs1234212	10	89608892	CFL1P1;KLLN	T	C	0.370691	0.0125	0.0021	2.968e-09	35.4308
	EAS + EUR	HbA1c	rs11187138	10	94460281	HHEX;EXOC6	G	A	0.460569	-0.0284	0.0021	4.304e-42	182.893
	EAS + EUR	HbA1c	rs2068888	10	94839642	CYP26A1;MYOF	A	G	0.477685	-0.0141	0.002	4.241e-12	49.7025
	EAS + EUR	HbA1c	rs11191537	10	104817709	CNNM2	G	A	0.148774	0.0161	0.0028	1.544e-08	33.0625
	EAS + EUR	HbA1c	rs114322470	10	114736670	TCF7L2	G	T	0.019319	-0.0538	0.0085	2.207e-10	40.0615
	EAS + EUR	HbA1c	rs34872471	10	114754071	TCF7L2	C	T	0.24946	0.0709	0.0025	4.4e-184	804.29
	EAS + EUR	HbA1c	rs10736269	10	120422764	PRLHR;CACUL1	C	T	0.460421	-0.013	0.002	1.8e-10	42.25
	EAS + EUR	HbA1c	rs10886547	10	121699856	SEC23IP	C	T	0.180218	0.015	0.0027	2.815e-08	30.8642
	EAS + EUR	HbA1c	rs3782123	11	205198	BET1L	A	C	0.682503	-0.0301	0.0022	6.738e-42	187.192
	EAS + EUR	HbA1c	rs734351	11	2156213	IGF2	A	G	0.570801	0.0116	0.0021	4.525e-08	30.5125
	EAS + EUR	HbA1c	rs11564725	11	2177369	INS-IGF2	T	C	0.201038	0.025	0.0027	5.038e-21	85.7339
	EAS + EUR	HbA1c	rs2237895	11	2857194	KCNQ1	C	A	0.407846	0.0311	0.0021	6.97e-52	219.322
	EAS + EUR	HbA1c	rs9943599	11	9752741	SWAP70	T	C	0.539104	-0.0272	0.002	2.692e-40	184.96
	EAS + EUR	HbA1c	rs11042852	11	10517661	AMPD3	G	A	0.086798	0.0399	0.0041	3.1e-22	94.7061
	EAS + EUR	HbA1c	rs11512059	11	16276894	SOX6	T	C	0.082987	0.0273	0.0042	6.484e-11	42.25
	EAS + EUR	HbA1c	rs7124355	11	17412960	KCNJ11;ABCC8	G	A	0.667134	-0.019	0.0021	8.835e-19	81.8594
	EAS + EUR	HbA1c	rs147208676	11	34782989	EHF;APIP	T	C	0.081564	0.0257	0.0042	1.287e-09	37.4427
	EAS + EUR	HbA1c	rs4755309	11	45207183	PRDM11	T	G	0.11369	-0.0253	0.0036	2.864e-12	49.3897
	EAS + EUR	HbA1c	rs11039165	11	47312689	MADD	G	A	0.226738	-0.0261	0.0026	2.105e-24	100.771
	EAS + EUR	HbA1c	rs12279944	11	55154479	OR4A15;OR4C15	A	G	0.11767	-0.0205	0.0035	8.276e-09	34.3061
	EAS + EUR	HbA1c	rs174549	11	61571382	FADS1	A	G	0.323733	-0.0244	0.0022	1.139e-29	123.008
	EAS + EUR	HbA1c	rs1152620	11	65257329	LOC101927789;MALAT1	G	A	0.289131	0.0152	0.0022	1.051e-11	47.7355
	EAS + EUR	HbA1c	rs77464186	11	72460398	ARAP1	C	A	0.137004	-0.0352	0.003	3.658e-31	137.671
	EAS + EUR	HbA1c	rs689419	11	75926967	WNT11;THAP12	G	T	0.81819	0.0166	0.0028	2.469e-09	35.148
	EAS + EUR	HbA1c	rs10765572	11	92681234	LINC02746;MTNR1B	C	T	0.310875	0.0446	0.0022	5.79e-90	410.983
	EAS + EUR	HbA1c	rs744036	11	100444523	CNTN5;LOC100128386	T	C	0.294087	-0.0208	0.0022	1.822e-20	89.3884
	EAS + EUR	HbA1c	rs10750594	11	100533622	CNTN5;LOC100128386	C	A	0.492477	-0.0141	0.0021	1.09e-11	45.0816
	EAS + EUR	HbA1c	rs145892119	11	119013740	HINFP;ABCG4	T	C	0.074451	-0.03	0.0044	7.707e-12	46.4876
	EAS + EUR	HbA1c	rs6589939	11	122518525	MIR100HG;UBASH3B	G	A	0.340834	0.0149	0.0022	1.22e-11	45.8698
	EAS + EUR	HbA1c	rs7308094	12	4294769	PARP11;CCND2-AS1	T	C	0.16287	0.0153	0.0028	3.034e-08	29.8584
	EAS + EUR	HbA1c	rs75616205	12	4316171	PARP11;CCND2-AS1	G	A	0.026029	-0.07	0.0075	8.95e-21	87.1111
	EAS + EUR	HbA1c	rs3217860	12	4399050	CCND2	G	A	0.30297	0.019	0.0023	1.446e-16	68.242
	EAS + EUR	HbA1c	rs11046171	12	21870385	LDHB;KCNJ8	C	T	0.216844	-0.0143	0.0025	8.17e-09	32.7184
	EAS + EUR	HbA1c	rs10492373	12	27959998	KLHL42;PTHLH	A	G	0.214609	-0.0233	0.0024	1.561e-21	94.2517
	EAS + EUR	HbA1c	rs117709065	12	48314782	VDR;TMEM106C	T	C	0.017646	-0.0805	0.0091	1.148e-18	78.2544
	EAS + EUR	HbA1c	rs4760682	12	48512285	PFKM	A	C	0.81301	0.0785	0.0029	2.09e-156	732.729
	EAS + EUR	HbA1c	rs55770587	12	49586676	TUBA1A;TUBA1C	T	C	0.041923	-0.0455	0.0057	2.256e-15	63.7196
	EAS + EUR	HbA1c	rs79755767	12	54698408	NFE2;COPZ1	A	G	0.099979	-0.036	0.0039	1.236e-20	85.2071
	EAS + EUR	HbA1c	rs2612059	12	66239111	HMGA2	C	A	0.174305	0.024	0.0027	1.495e-19	79.0123
	EAS + EUR	HbA1c	rs301001	12	95916956	USP44	C	T	0.56969	0.0115	0.0021	3e-08	29.9887
	EAS + EUR	HbA1c	rs79621919	12	97860592	RMST	A	G	0.0485598	-0.0384	0.0049	4.614e-15	61.4144
	EAS + EUR	HbA1c	rs11065979	12	112059557	ATXN2-AS;BRAP	T	C	0.43738	-0.0285	0.0023	1.211e-34	153.544
	EAS + EUR	HbA1c	rs1051470	12	118583232	PEBP1	C	T	0.601394	-0.0151	0.0021	2.476e-13	51.7029
	EAS + EUR	HbA1c	rs73226260	12	121380541	XLOC_009911;HNF1A-AS1	A	G	0.034445	-0.0424	0.0064	3.189e-11	43.8906
	EAS + EUR	HbA1c	rs11058322	12	122642027	MLXIP;LRRC43	T	C	0.126142	-0.0193	0.0031	6.8e-10	38.7607
	EAS + EUR	HbA1c	rs75438052	12	123395555	VPS37B;ABCB9	C	A	0.048759	0.0306	0.0054	1.137e-08	32.1111
	EAS + EUR	HbA1c	rs1564648	12	133409584	GOLGA3;CHFR	A	G	0.451296	0.0116	0.0021	2.524e-08	30.5125
	EAS + EUR	HbA1c	rs55836809	13	28502874	PDX1;LINC00543	G	A	0.256936	0.0303	0.0024	4.659e-37	159.391
	EAS + EUR	HbA1c	rs211244	13	33563788	LINC00423;KL	T	C	0.662177	-0.0159	0.0022	2.05e-13	52.2335
	EAS + EUR	HbA1c	rs9527141	13	33725687	STARD13	T	C	0.227885	-0.0134	0.0024	2.406e-08	31.1736
	EAS + EUR	HbA1c	rs7334971	13	41683827	MIR3168;KBTBD6	C	A	0.601257	-0.0119	0.0021	2.903e-08	32.1111
	EAS + EUR	HbA1c	rs11616380	13	80705315	LINC01080;SPRY2	T	G	0.284921	-0.0173	0.0022	1.688e-14	61.8368
	EAS + EUR	HbA1c	rs12876143	13	113366291	ATP11A	C	T	0.0754903	0.0809	0.004	9.42e-93	409.051
	EAS + EUR	HbA1c	rs1278769	13	113536627	ATP11A	G	A	0.760367	0.0152	0.0024	1.055e-10	40.1111
	EAS + EUR	HbA1c	rs11616945	13	114575367	GAS6-DT;LINC00454	C	T	0.33701	0.016	0.0025	8.721e-11	40.96
	EAS + EUR	HbA1c	rs12016920	13	114639025	LINC00565;RASA3	C	T	0.19492	-0.0387	0.0029	3.98e-40	178.084
	EAS + EUR	HbA1c	rs12147688	14	20939589	PNP	T	G	0.25723	0.0215	0.0026	4.486e-16	68.3802
	EAS + EUR	HbA1c	rs8013143	14	23494277	PSMB5	G	A	0.23665	0.02	0.0025	1.434e-15	64
	EAS + EUR	HbA1c	rs4901844	14	38831819	CLEC14A;LINC00639	T	C	0.24892	-0.0237	0.0027	5.691e-19	77.0494
	EAS + EUR	HbA1c	rs79621605	14	50852634	CDKL1	C	T	0.0296368	-0.036	0.0063	8.534e-09	32.6531
	EAS + EUR	HbA1c	rs17101394	14	64232386	SGPP1;SYNE2	A	G	0.1429	0.0206	0.003	3.202e-12	47.1511
	EAS + EUR	HbA1c	rs1271040	14	65265685	SPTB	G	A	0.35081	0.0258	0.0024	7.683e-27	115.562
	EAS + EUR	HbA1c	rs10873398	14	90046070	FOXN3	A	G	0.553804	-0.0216	0.0023	2.244e-21	88.1966
	EAS + EUR	HbA1c	rs61990729	14	100828625	WARS	T	C	0.200405	-0.0207	0.0026	2.045e-15	63.3861
	EAS + EUR	HbA1c	rs8008285	14	101146514	LINC00523;DLK1	C	T	0.124466	0.0233	0.0032	4.567e-13	53.0166
	EAS + EUR	HbA1c	rs12912777	15	38852386	RASGRP1	T	C	0.12668	0.0214	0.0035	6.159e-10	37.3845
	EAS + EUR	HbA1c	rs28526689	15	41927330	TYRO3;MGA	A	G	0.312914	0.0142	0.0022	2.115e-10	41.6612
	EAS + EUR	HbA1c	rs28413704	15	44148427	WDR76	G	A	0.116351	-0.0201	0.0031	1.081e-10	42.0406
	EAS + EUR	HbA1c	rs149336329	15	52587740	MYO5C	T	G	0.0486226	-0.0444	0.0047	3.103e-21	89.2422
	EAS + EUR	HbA1c	rs6494529	15	65902922	INTS14	A	G	0.483007	0.0194	0.0021	2.276e-20	85.3424
	EAS + EUR	HbA1c	rs59153558	15	77806770	HMG20A;LOC101929457	G	A	0.666635	0.0281	0.0022	2.008e-37	163.143
	EAS + EUR	HbA1c	rs7166540	15	86244085	AKAP13	G	A	0.23753	-0.0188	0.0027	4.977e-12	48.4829
	EAS + EUR	HbA1c	rs12912009	15	90429148	AP3S2;ARPIN-AP3S2	A	G	0.735507	-0.0185	0.0023	1.074e-15	64.6975
	EAS + EUR	HbA1c	rs79315568	15	90654620	IDH2-DT	C	T	0.57464	-0.0138	0.0023	3.233e-09	36
	EAS + EUR	HbA1c	rs73502775	15	91536225	PRC1	A	G	0.215328	0.0147	0.0025	4.052e-09	34.5744
	EAS + EUR	HbA1c	rs9788833	16	292772	FAM234A	C	T	0.385065	-0.0218	0.0021	1.304e-24	107.764
	EAS + EUR	HbA1c	rs2113260	16	11455993	RMI2;LOC400499	C	T	0.707436	-0.018	0.0023	4.526e-15	61.2476
	EAS + EUR	HbA1c	rs165975	16	16133994	ABCC1	C	T	0.26198	0.0162	0.0023	1.874e-12	49.6106
	EAS + EUR	HbA1c	rs181207	16	28513530	IL27	T	C	0.299045	0.0212	0.0023	1.801e-20	84.9603
	EAS + EUR	HbA1c	rs4889490	16	30823047	ZNF629;BCL7C	T	G	0.479502	-0.0146	0.0022	8.621e-11	44.0413
	EAS + EUR	HbA1c	rs8050500	16	31404571	ITGAD	C	T	0.467568	-0.0226	0.002	1.811e-28	127.69
	EAS + EUR	HbA1c	rs1121980	16	53809247	FTO	A	G	0.390088	0.0233	0.0021	1.465e-28	123.104
	EAS + EUR	HbA1c	rs28628339	16	68803844	CDH1	G	A	0.29155	0.023	0.0025	8.165e-20	84.64
	EAS + EUR	HbA1c	rs9936550	16	75242850	CTRB2;CTRB1	T	C	0.0679187	-0.0281	0.0042	1.629e-11	44.7625
	EAS + EUR	HbA1c	rs247826	16	84582965	MEAK7;COTL1	T	C	0.212027	0.0226	0.0025	1.524e-19	81.7216
	EAS + EUR	HbA1c	rs7195055	16	88816310	PIEZO1	T	C	0.015239	-0.058	0.0097	1.843e-09	35.753
	EAS + EUR	HbA1c	rs2968478	16	88858646	PIEZO1;CDT1	G	T	0.589437	0.0487	0.0021	1.75e-119	537.798
	EAS + EUR	HbA1c	rs9901806	17	1959822	HIC1	T	C	0.531141	-0.0153	0.0021	4.272e-13	53.0816
	EAS + EUR	HbA1c	rs2641443	17	2036162	SMG6	A	G	0.274765	-0.0139	0.0023	8.877e-10	36.5236
	EAS + EUR	HbA1c	rs1641523	17	7549681	ATP1B2	T	C	0.535411	-0.0245	0.0021	1.037e-32	136.111
	EAS + EUR	HbA1c	rs4792687	17	8160602	PFAS	C	T	0.50569	-0.0219	0.0023	1.814e-21	90.6635
	EAS + EUR	HbA1c	rs1108646	17	17751478	TOM1L2	G	A	0.594387	-0.0299	0.0023	6.582e-39	169
	EAS + EUR	HbA1c	rs8070401	17	20214492	SPECC1	T	C	0.715662	0.0142	0.0024	4.362e-09	35.0069
	EAS + EUR	HbA1c	rs8067342	17	21156860	NATD1	T	C	0.290883	-0.0186	0.0023	3.422e-16	65.3989
	EAS + EUR	HbA1c	rs9303620	17	27152869	FAM222B	C	T	0.287626	-0.0213	0.0022	8.791e-22	93.7376
	EAS + EUR	HbA1c	rs11651755	17	36099840	HNF1B	T	C	0.541611	-0.0192	0.0021	9.329e-21	83.5918
	EAS + EUR	HbA1c	rs62076542	17	45558090	MRPL45P2	T	C	0.48982	0.0152	0.0023	3.718e-11	43.6749	excluded
	EAS + EUR	HbA1c	rs11079803	17	46019901	PNPO	A	G	0.503982	-0.013	0.0021	4.992e-10	38.322
	EAS + EUR	HbA1c	rs9892222	17	57373266	GDPD1;YPEL2	C	T	0.073021	0.0274	0.0039	3.348e-12	49.3596
	EAS + EUR	HbA1c	rs12600858	17	57504920	YPEL2;LINC01476	A	G	0.305598	-0.0226	0.0024	1.568e-21	88.6736
	EAS + EUR	HbA1c	rs57891429	17	62181990	ERN1	C	T	0.13181	0.0188	0.0034	3.57e-08	30.5744
	EAS + EUR	HbA1c	rs62084234	17	65847060	BPTF	G	A	0.281359	0.0167	0.0025	1.081e-11	44.6224
	EAS + EUR	HbA1c	rs2748427	17	76121864	TMC6	G	A	0.213709	0.0718	0.0025	9.23e-187	824.838
	EAS + EUR	HbA1c	rs11657180	17	76131247	TMC8	A	G	0.0995893	-0.0248	0.0033	9.698e-14	56.4775
	EAS + EUR	HbA1c	rs111978523	17	76198735	AFMID	G	A	0.13609	0.0167	0.003	1.592e-08	30.9878
	EAS + EUR	HbA1c	rs9909940	17	80689036	FN3KRP;FN3K	T	C	0.332503	0.0589	0.0021	2.07e-166	786.669
	EAS + EUR	HbA1c	rs4335852	18	43766754	C18orf25	A	G	0.25155	-0.0239	0.0027	2.432e-19	78.3553
	EAS + EUR	HbA1c	rs6565922	18	74558999	ZNF236	T	C	0.403852	0.0138	0.0021	3.261e-11	43.1837
	EAS + EUR	HbA1c	rs4807455	19	1033559	CNN2	A	G	0.276693	0.0126	0.0023	4.447e-08	30.0113
	EAS + EUR	HbA1c	rs72973028	19	3341451	CELF5;NFIC	C	A	0.17238	0.02	0.0031	6.967e-11	41.6233
	EAS + EUR	HbA1c	rs8110787	19	12999458	KLF1;GCDH	T	C	0.34464	-0.0202	0.0022	6.178e-20	84.3058
	EAS + EUR	HbA1c	rs35365035	19	17252151	MYO9B	C	T	0.402229	0.0394	0.0021	6.182e-81	352.009
	EAS + EUR	HbA1c	rs924150	19	31829903	TSHZ3	C	A	0.403006	-0.0129	0.0021	1.995e-09	37.7347
	EAS + EUR	HbA1c	rs4499344	19	33073431	PDCD5	A	G	0.397424	-0.027	0.0024	8.304e-30	126.562
	EAS + EUR	HbA1c	rs17561351	19	45372329	NECTIN2	G	A	0.063911	0.0312	0.0047	3.834e-11	44.067
	EAS + EUR	HbA1c	rs10407429	19	46157237	EML2;GIPR	A	G	0.392504	-0.0233	0.0021	2.206e-28	123.104
	EAS + EUR	HbA1c	rs62136856	19	47573527	ZC3H4	G	A	0.71661	0.0188	0.0025	1.835e-13	56.5504
	EAS + EUR	HbA1c	rs12459419	19	51728477	CD33	T	C	0.303209	-0.0223	0.0022	1.224e-23	102.746
	EAS + EUR	HbA1c	rs45607834	19	55693286	PTPRH	T	C	0.10266	0.0228	0.0038	1.987e-09	36
	EAS + EUR	HbA1c	rs6077396	20	8604593	PLCB1	A	G	0.488992	-0.0185	0.002	8.759e-20	85.5625
	EAS + EUR	HbA1c	rs149142833	20	32188142	CBFA2T2	T	C	0.133427	0.0246	0.0031	3.668e-15	62.9719
	EAS + EUR	HbA1c	rs16988991	20	42989777	HNF4A	A	G	0.21003	0.0164	0.0025	9.431e-11	43.0336
	EAS + EUR	HbA1c	rs6066141	20	45597546	EYA2	C	T	0.235542	-0.0221	0.0025	4.476e-18	78.1456
	EAS + EUR	HbA1c	rs737092	20	55990405	RBM38;CTCFL	C	T	0.48702	0.0245	0.002	1.217e-33	150.062
	EAS + EUR	HbA1c	rs4809556	20	61271339	MIR1-1HG;SLCO4A1	A	G	0.610809	-0.0165	0.0021	5.848e-15	61.7347
	EAS + EUR	HbA1c	rs4809329	20	62348460	ZGPAT	T	C	0.66634	0.0145	0.0024	2.495e-09	36.5017
	EAS + EUR	HbA1c	rs3827181	21	35107734	ITSN1	T	C	0.387618	0.0163	0.0021	1.036e-14	60.2472
	EAS + EUR	HbA1c	rs2070567	21	45726248	PFKL	T	C	0.14358	-0.0233	0.0033	1.294e-12	49.8522
	EAS + EUR	HbA1c	rs2026882	21	46322853	ITGB2	T	C	0.149294	-0.0169	0.0029	4.395e-09	33.9608
	EAS + EUR	HbA1c	rs2240716	22	19969696	ARVCF	T	C	0.291594	0.0122	0.0022	4.904e-08	30.7521
	EAS + EUR	HbA1c	rs6518681	22	30609554	HORMAD2;LIF-AS1	G	A	0.907019	0.0326	0.004	2.493e-16	66.4225
	EAS + EUR	HbA1c	rs117721418	22	32394519	LINC02558	T	C	0.0674843	-0.033	0.0042	3.533e-15	61.7347
	EAS + EUR	HbA1c	rs855791	22	37462936	TMPRSS6	G	A	0.539336	-0.0525	0.002	2.5e-146	689.062
	EAS + EUR	HbA1c	rs2143918	22	43114020	A4GALT	C	A	0.526931	-0.0253	0.0021	3.926e-33	145.145
